# Supplementary material for: Genome of the facultative scuticociliatosis pathogen Pseudocohnilembus persalinus provides insight into its virulence through horizontal gene transfer
Source: PubMed Central journal article supplement (PMC4614350; doi:10.1038/srep15470), 2015-10-21
Supplement: srep15470-s1.pdf [file srep15470-s1.pdf]

# Genome of the facultative scuticociliatosis pathogen *Pseudocohnilembus persalinus* provides insight into its virulence through horizontal gene transfer

Jie Xiong<sup>1</sup>, Guangying Wang<sup>1,2</sup>, Jun Cheng<sup>1,3</sup>, Miao Tian<sup>1,2</sup>, Xuming Pan<sup>4</sup>, Alan Warren<sup>5</sup>, Chuanqi Jiang<sup>1,2</sup>, Dongxia Yuan<sup>1</sup>, Wei Miao<sup>1§</sup>

<sup>1</sup>Key Laboratory of Aquatic Biodiversity and Conservation, Institute of Hydrobiology, Chinese Academy of Sciences, Wuhan 430072, China;

<sup>2</sup>University of Chinese Academy of Sciences, Beijing 100049, China

<sup>3</sup>Guangdong Ocean University, Zhanjiang 524088, China

<sup>4</sup>Lab of Protozoology, Department of Biology, College of Life Science and Technology, Harbin Normal University, Harbin 150025, China

<sup>5</sup>Department of Life Sciences, Natural History Museum, Cromwell Road, London SW7 5BD, United Kingdom

<sup>§</sup>Corresponding author: Wei Miao

Email: [miaowei@ihb.ac.cn](mailto:miaowei@ihb.ac.cn)

Tel: +86-27-68780050

Fax: +86-27-68780050

Running title: Horizontal virulence gene transfers in *Pseudocohnilembus persalinus*

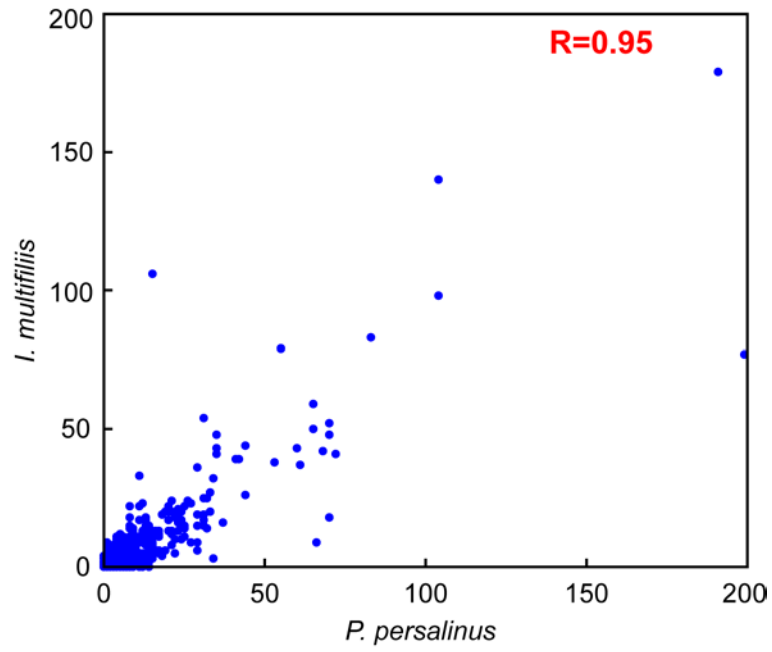

**Figure S1. Correlation of the protein domain composition between *I. multifiliis* and *P. persalinus*.** Domains were predicted using Pfam database.

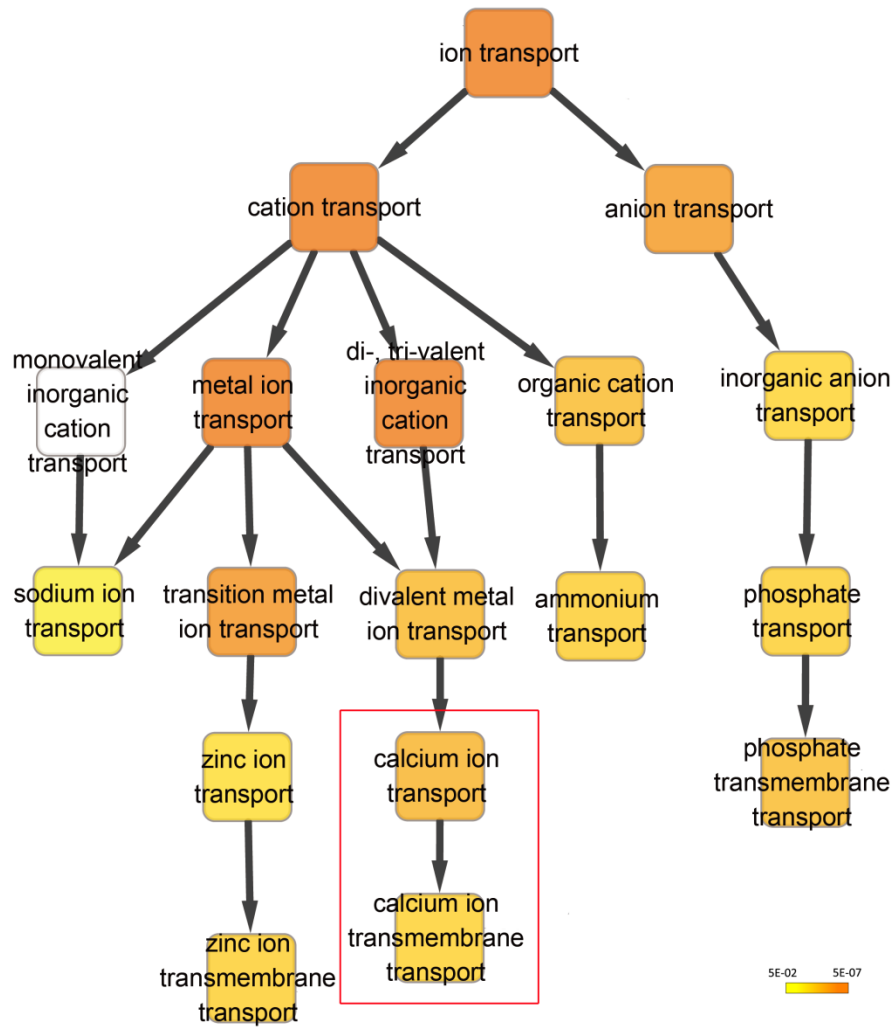

**Figure S2. The functional enrichment of specific transporters in *P. persalinus*.** Yellow boxes depict the significantly enriched GO terms, calcium-related processes are highlighted with a red box. GO: gene ontology.

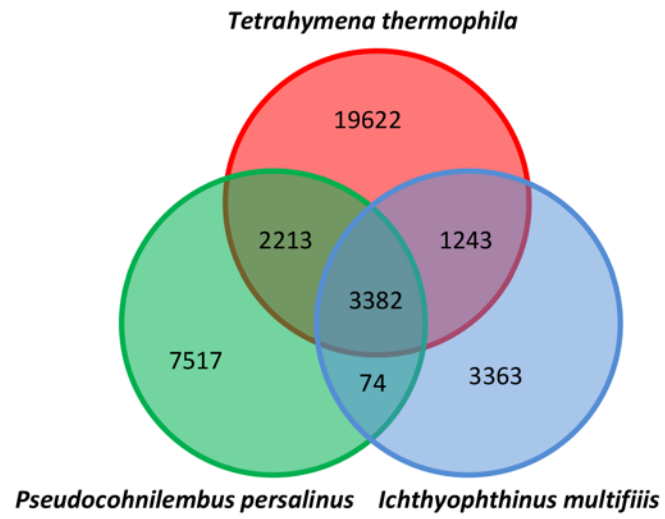

Figure S3. Orthologs among *T. thermophila*, *I. multifiliis* and *P. persalinus*.

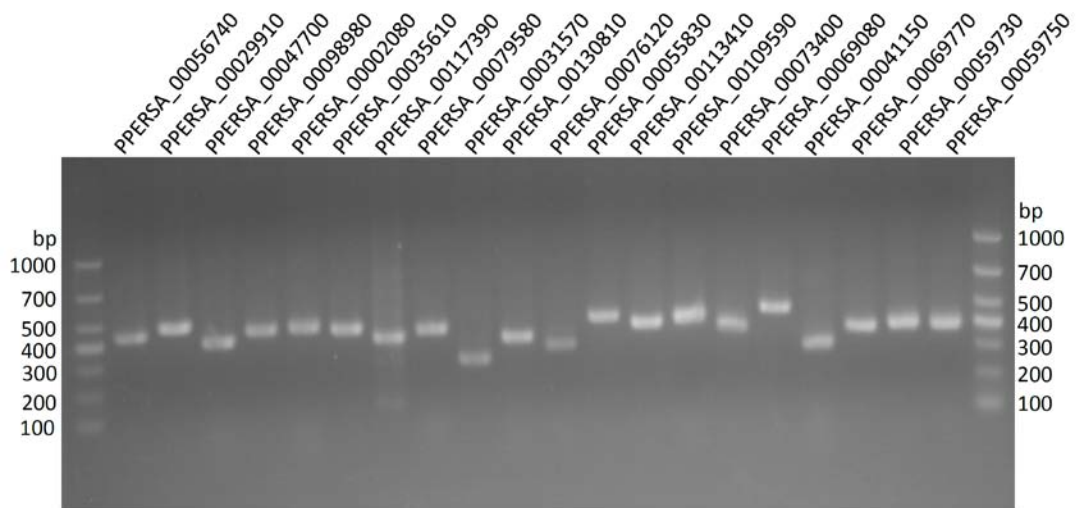

**Figure S4. PCR verification of HGT genes.**



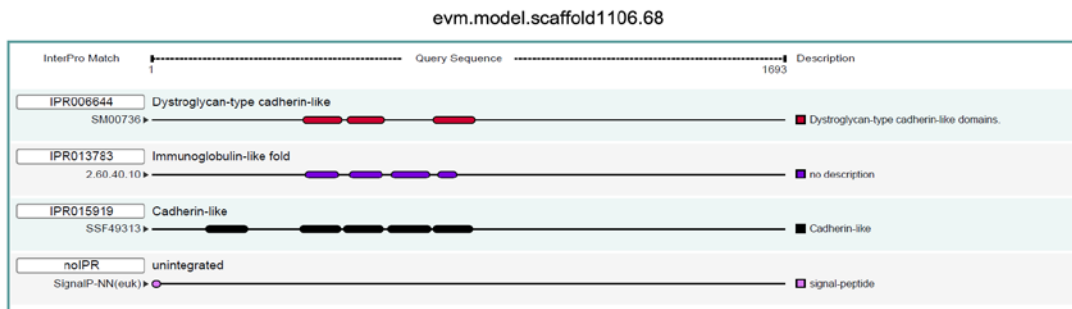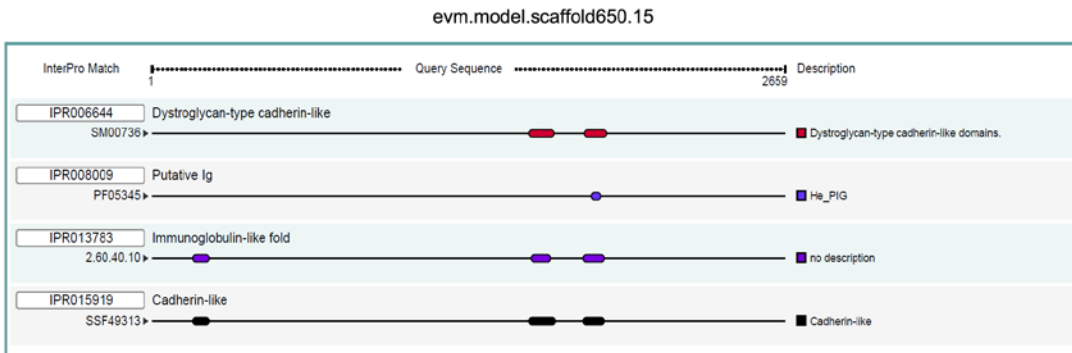

**Figure S6. The domain composition of two Ig family HGT genes.** Domains were predicted using Interproscan. Interproscan is an integrated predicted tools for many domain knowledge sources; different tracks represent the results predicted by different sources.

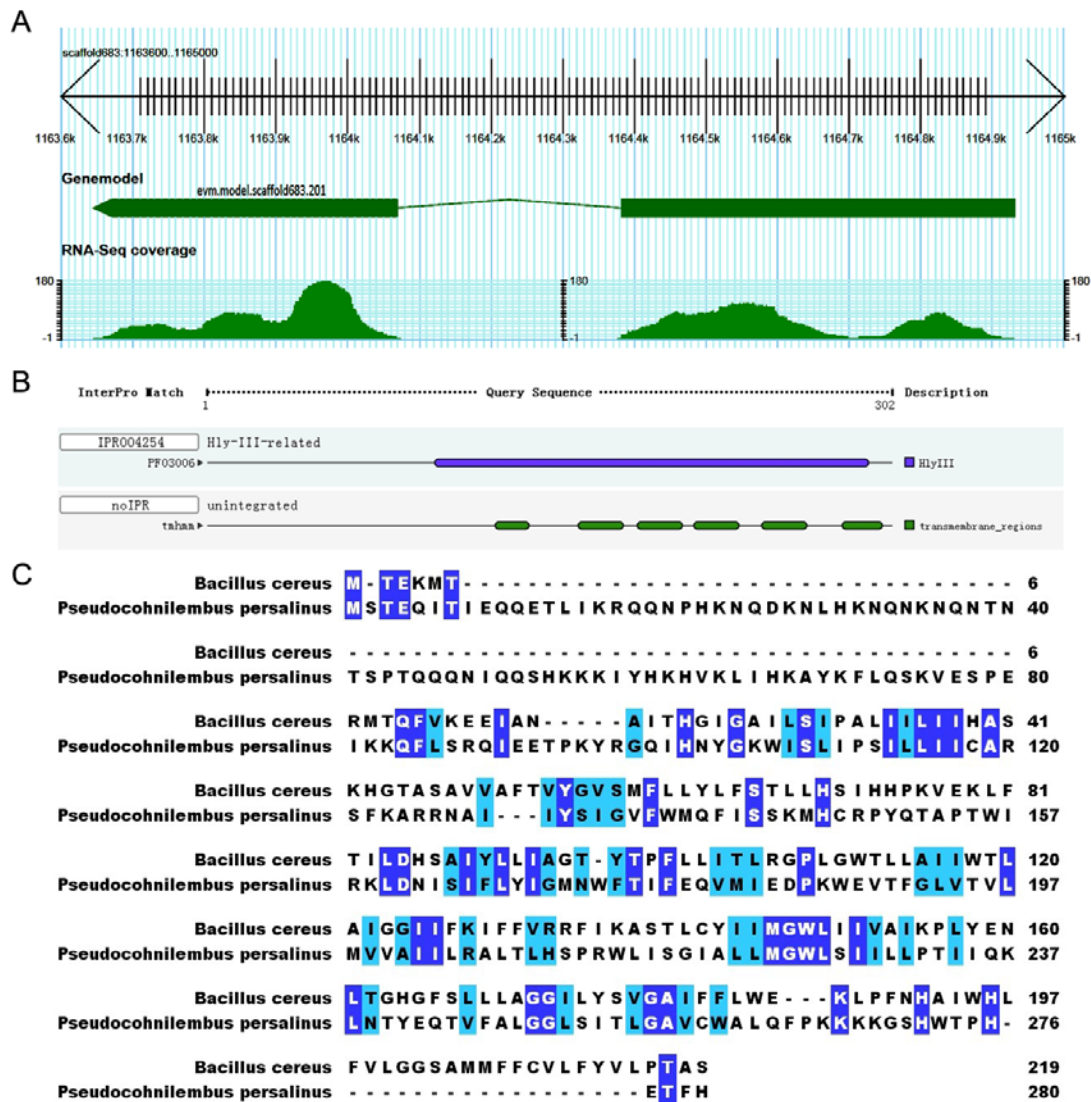

**Figure S7. The structure, domain and sequence of the hemolysin III gene.** A, the gene structure, one RNA-Seq-supported intron was found in the hemolysin III HGT gene; B, domain and transmembrane helices information; C, sequence comparison between the *P. persalinus* and *Bacillus cereus* (bacterial) hemolysin III gene.



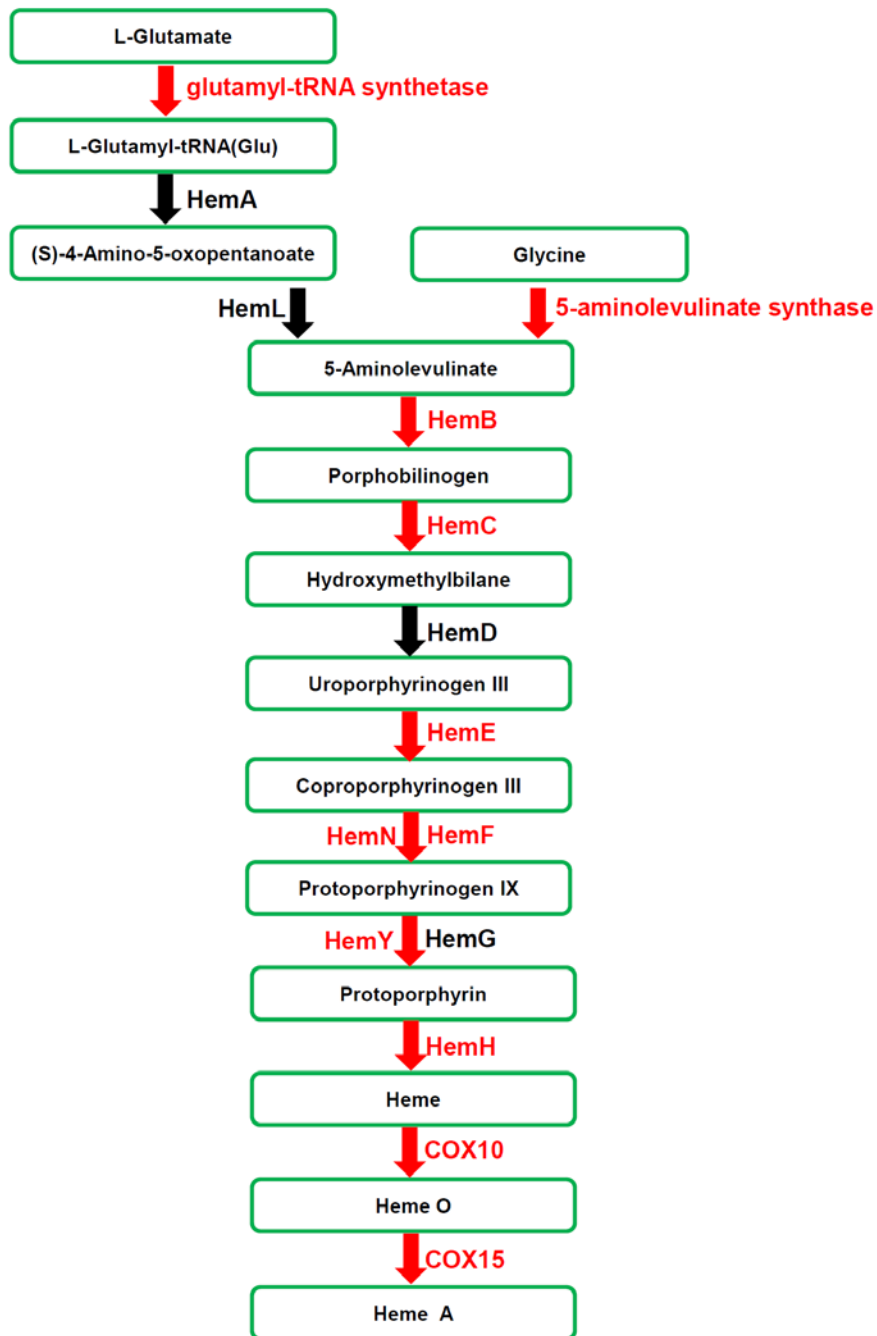

**Figure S8. The heme synthesis pathway in *P. persalinus*.** The pathway is annotated by mapping the predicted protein sequences to KEGG orthologs. Green boxes represent the compounds. Red arrows indicate the existence of KEGG orthologs (enzymes) in *P. persalinus*. KEGG: Kyoto Encyclopedia of Genes and Genomes.



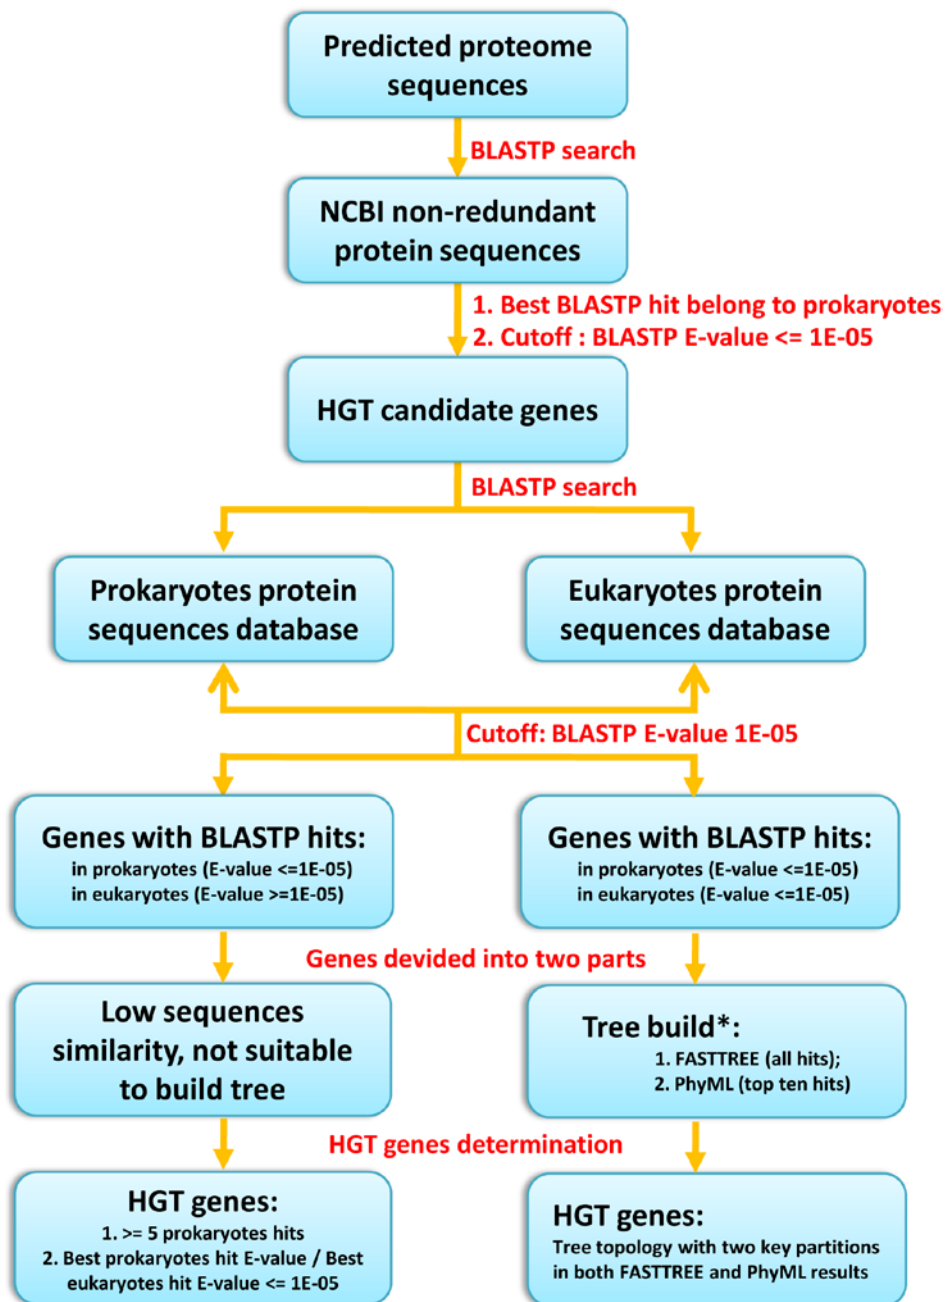

Figure S10. HGT genes identification pipeline.

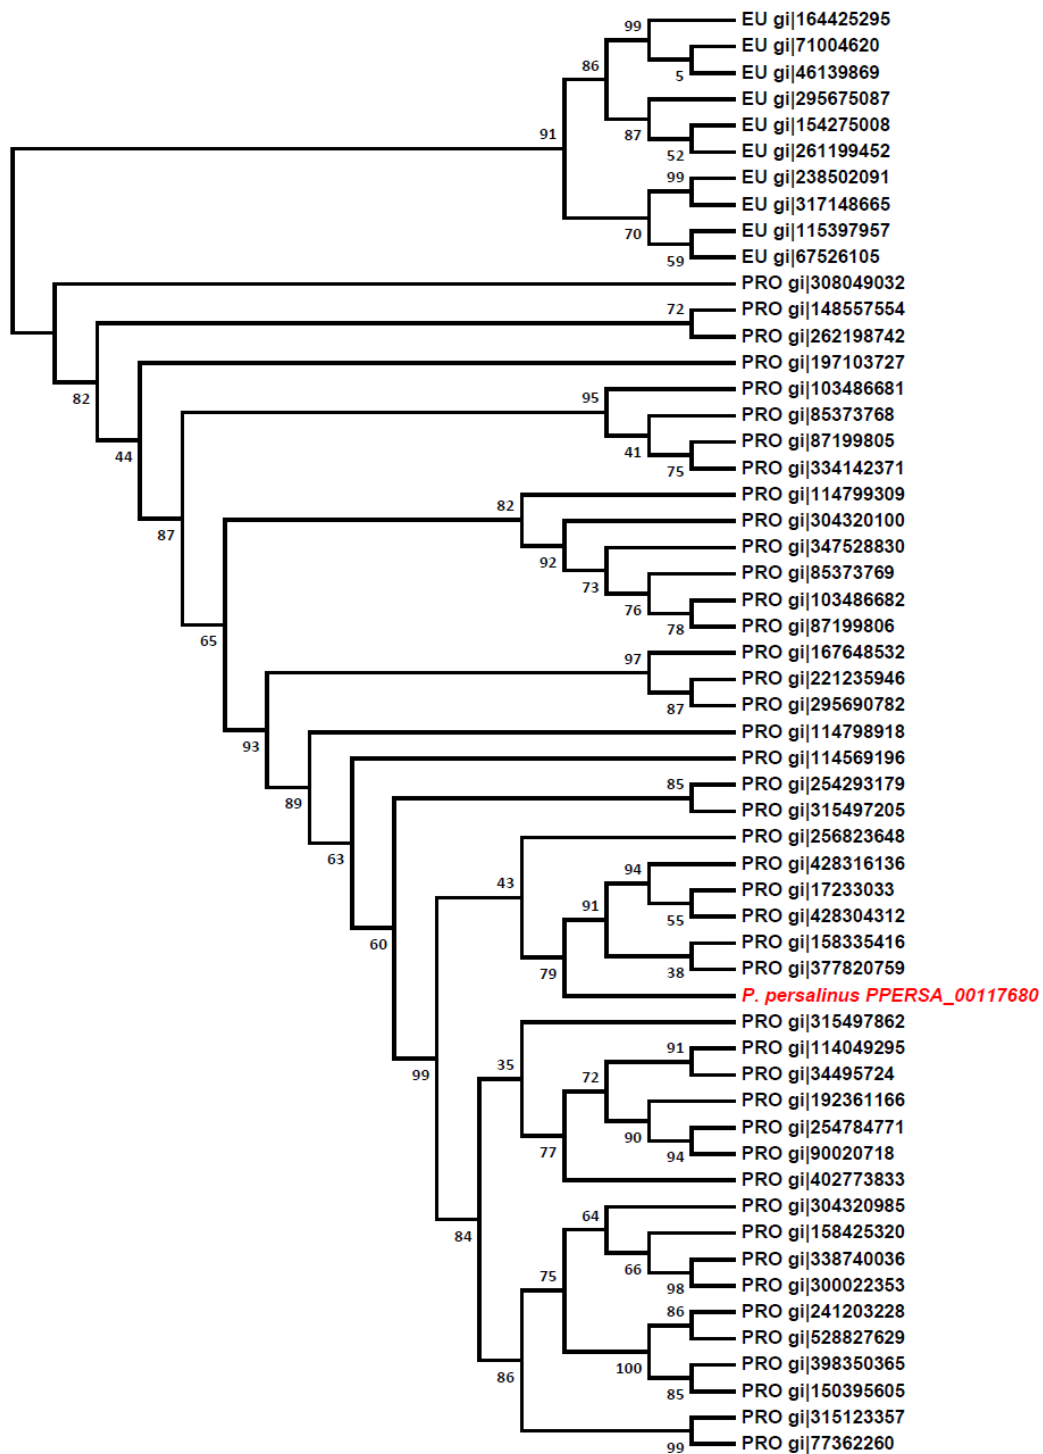

**Figure S11. A case (PPERSA\_00117680) showed the phylogenetic tree topology used for HGT gene identification. EU, eukaryotes; PRO, prokaryotes. Genes used to construct the phylogenetic tree are indicated by the Genbank gi number. *P. persalinus* gene was highlighted as red.**

**Table S1. Comparison of the proteases of four sequenced ciliates.**

| Species               | Catalytic class |          |         |        |           | Total | Percentage of the proteome |
|-----------------------|-----------------|----------|---------|--------|-----------|-------|----------------------------|
|                       | Aspartic        | Cysteine | Metallo | Serine | Threonine |       |                            |
| <i>P. persalinus</i>  | 13              | 137      | 113     | 92     | 14        | 369   | 2.8                        |
| <i>I. multifiliis</i> | 14              | 81       | 119     | 25     | 15        | 254   | 3.1                        |
| <i>P. tetraurelia</i> | 48              | 225      | 168     | 95     | 42        | 578   | 1.5                        |
| <i>T. thermophila</i> | 43              | 211      | 139     | 73     | 14        | 480   | 1.7                        |

**Table S2. The 106 *P. persalinus* specific transporters comparing to *T. thermophila*.**

| Gene_ID         | TCDB_best_hit                                                     | E-value   | TMHMM | Toppred | SCAMPI | TCDB family  |
|-----------------|-------------------------------------------------------------------|-----------|-------|---------|--------|--------------|
| PPERSA_00016260 | P08104, sodium channel protein, brain iii alpha subunit           | 3.00E-53  | 16    | 22      | 20     | 1.A.1.10.1   |
| PPERSA_00025690 | O60840, Voltage-dependent L-type calcium channel subunit alpha-1F | 2.00E-05  | 7     | 6       | 7      | 1.A.1.11.11  |
| PPERSA_00035650 | Q61290, Voltage-dependent R-type calcium channel alpha-1e subunit | 2.00E-05  | 3     | 3       | 4      | 1.A.1.11.3   |
| PPERSA_00099750 | Q61290, Voltage-dependent R-type calcium channel alpha-1e subunit | 2.00E-19  | 3     | 4       | 4      | 1.A.1.11.3   |
| PPERSA_00125210 | Q61290, Voltage-dependent R-type calcium channel alpha-1e subunit | 5.00E-22  | 6     | 7       | 6      | 1.A.1.11.3   |
| PPERSA_00034770 | Q61290, Voltage-dependent R-type calcium channel alpha-1e subunit | 5.00E-30  | 9     | 9       | 10     | 1.A.1.11.3   |
| PPERSA_00026650 | Q61290, Voltage-dependent R-type calcium channel alpha-1e subunit | 8.00E-06  | 9     | 10      | 10     | 1.A.1.11.3   |
| PPERSA_00107800 | Q8R4F0, Mucolipin-3                                               | 3.00E-07  | 5     | 6       | 6      | 1.A.5.3.2    |
| PPERSA_00042560 | Q8IZK6, Mucolipin-2                                               | 3.00E-04  | 2     | 4       | 3      | 1.A.5.3.3    |
| PPERSA_00111700 | Q8IZK6, Mucolipin-2                                               | 9.00E-07  | 5     | 8       | 7      | 1.A.5.3.3    |
| PPERSA_00003520 | Q02563, Synaptic vesicle protein 2 (SV2)                          | 3.00E-09  | 6     | 6       | 6      | 2.A.1.22.1   |
| PPERSA_00028190 | Q02563, Synaptic vesicle protein 2 (SV2)                          | 5.00E-19  | 9     | 10      | 9      | 2.A.1.22.1   |
| PPERSA_00021720 | Q02563, Synaptic vesicle protein 2 (SV2)                          | 6.00E-13  | 12    | 11      | 12     | 2.A.1.22.1   |
| PPERSA_00015020 | Q6KCM7, Calcium-binding mitochondrial carrier protein SCaMC-2     | 1.00E-58  | 2     | 3       | 3      | 2.A.29.23.1  |
| PPERSA_00013920 | Q6KCM7, Calcium-binding mitochondrial carrier protein SCaMC-2     | 5.00E-75  | 2     | 4       | 3      | 2.A.29.23.1  |
| PPERSA_00005690 | P39109, Metal resistance protein YCF1 (Yeast cadmium factor 1)    | 2.00E-56  | 4     | 4       | 4      | 3.A.1.208.11 |
| PPERSA_00027070 | P39109, Metal resistance protein YCF1 (Yeast cadmium factor 1)    | 1.00E-102 | 3     | 3       | 5      | 3.A.1.208.11 |
| PPERSA_00095340 | P16389, Potassium voltage-gated channel subfamily A member 2      | 6.00E-17  | 2     | 3       | 2      | 1.A.1.2.10   |
| PPERSA_00041650 | P16389, Potassium voltage-gated channel subfamily A member 2      | 3.00E-06  | 1     | 3       | 3      | 1.A.1.2.10   |
| PPERSA_00101590 | Q02094, Rhesus blood group-associated glycoprotein                | 3.00E-47  | 8     | 9       | 9      | 1.A.11.4.3   |
| PPERSA_00101600 | Q02094, Rhesus blood group-associated glycoprotein                | 1.00E-57  | 12    | 11      | 12     | 1.A.11.4.3   |
| PPERSA_00119880 | Q8VZR6, Probable inositol transporter 1                           | 2.00E-82  | 12    | 11      | 10     | 2.A.1.1.66   |
| PPERSA_00033520 | Q86VW1, Solute carrier family 22 member 16                        | 3.00E-14  | 6     | 5       | 6      | 2.A.1.19.12  |

|                 |                                                                                                                                                          |          |    |    |    |              |
|-----------------|----------------------------------------------------------------------------------------------------------------------------------------------------------|----------|----|----|----|--------------|
| PPERSA_00091860 | O35633, Vesicular inhibitory amino acid transporter                                                                                                      | 2.00E-04 | 6  | 6  | 6  | 2.A.18.5.3   |
| PPERSA_00057540 | A7ZUZ0, Melibiose carrier protein                                                                                                                        | 3.00E-05 | 12 | 11 | 10 | 2.A.2.1.1    |
| PPERSA_00105270 | O43808, Peroxisomal membrane protein PMP34 (34 kDa peroxisomal membrane protein) (Solute carrier family 25, member 17)                                   | 4.00E-30 | 2  | 5  | 4  | 2.A.29.20.1  |
| PPERSA_00052210 | O04619, Adenine nucleotide transporter, ADNT1                                                                                                            | 2.00E-15 | 2  | 5  | 2  | 2.A.29.23.4  |
| PPERSA_00034270 | Q00319, Peroxisomal membrane protein PMP47B                                                                                                              | 8.00E-22 | 10 | 11 | 10 | 2.A.29.6.1   |
| PPERSA_00037870 | P39580 2.A.50.2.1 Protein dltB - Bacillus subtilis.Length = 395                                                                                          | 3.00E-06 | 7  | 9  | 8  | 2.A.50.2.1   |
| PPERSA_00037910 | Q9SKZ5, Expressed protein                                                                                                                                | 3.00E-16 | 4  | 6  | 4  | 2.A.71.2.2   |
| PPERSA_00084580 | P11024, NAD(P) Transhydrogenase, mitochondrial precursor (EC: 1.6.1.2) (pyridine nucleotide transhydrogenase) (nicotinamide nucleotide transhydrogenase) | 0        | 11 | 12 | 10 | 3.D.2.3.1    |
| PPERSA_00089600 | P21439 3.A.1.201.3 Multidrug resistance protein 3 (P-glycoprotein 3) - Homo sapiens (Human).Length = 1286                                                | 2.00E-97 | 6  | 5  | 5  | 3.A.1.201.3  |
| PPERSA_00105470 | O22526, Cation-chloride co-transporter                                                                                                                   | 5.00E-96 | 9  | 12 | 13 | 2.A.30.6.1   |
| PPERSA_00046210 | P54144, High affinity ammonium transporter                                                                                                               | 7.00E-85 | 11 | 12 | 11 | 1.A.11.2.1   |
| PPERSA_00120960 | Q8RXN0, White-brown complex homolog protein 11                                                                                                           | 5.00E-70 | 7  | 5  | 6  | 3.A.1.204.8  |
| PPERSA_00057820 | P54144, High affinity ammonium transporter                                                                                                               | 4.00E-65 | 8  | 10 | 8  | 1.A.11.2.1   |
| PPERSA_00057690 | O07488, Sulfate permease                                                                                                                                 | 3.00E-64 | 9  | 9  | 11 | 2.A.53.3.1   |
| PPERSA_00049890 | P35498, Sodium channel protein type 1 subunit alpha - Homo sapiens (Human).Length = 2009                                                                 | 2.00E-62 | 16 | 19 | 15 | 1.A.1.10.7   |
| PPERSA_00063790 | O59666, Copper-transporting ATPase ccc2                                                                                                                  | 1.00E-57 | 8  | 8  | 8  | 3.A.3.5.29   |
| PPERSA_00021470 | Q71RS6, Sodium/potassium/calcium exchanger 5                                                                                                             | 1.00E-56 | 8  | 10 | 9  | 2.A.19.4.6   |
| PPERSA_00039930 | P08716, Hemolysin secretion ATP-binding protein                                                                                                          | 2.00E-53 | 1  | 3  | 1  | 3.A.1.109.1  |
| PPERSA_00113390 | Q9SVT8, Ammonium transporter 1 member 4                                                                                                                  | 5.00E-48 | 8  | 10 | 9  | 1.A.11.2.6   |
| PPERSA_00120950 | Q8RXN0, White-brown complex homolog protein 11                                                                                                           | 4.00E-46 | 7  | 6  | 6  | 3.A.1.204.8  |
| PPERSA_00027040 | Q7GB25, ABC transporter C family member 5                                                                                                                | 3.00E-40 | 1  | 1  | 1  | 3.A.1.208.22 |
| PPERSA_00034780 | O95180, Voltage-dependent T-type calcium channel subunit alpha-1H                                                                                        | 4.00E-40 | 6  | 7  | 7  | 1.A.1.11.5   |
| PPERSA_00092040 | Q86UD5, NHEDC2 protein                                                                                                                                   | 8.00E-40 | 11 | 10 | 10 | 2.A.36.8.1   |
| PPERSA_00063060 | Q38954, Putative phosphate permease                                                                                                                      | 9.00E-38 | 10 | 12 | 11 | 2.A.20.2.4   |

|                 |                                                                                |          |    |    |    |              |
|-----------------|--------------------------------------------------------------------------------|----------|----|----|----|--------------|
| PPERSA_00114070 | O43772, Mitochondrial carnitine/acylcarnitine carrier protein                  | 4.00E-37 | 2  | 4  | 3  | 2.A.29.8.3   |
| PPERSA_00079800 | Q9CR58, Similar to brain mitochondrial carrier protein-1 (BMCP-1)              | 2.00E-36 | 2  | 3  | 2  | 2.A.29.24.2  |
| PPERSA_00094200 | Q8NEW0, Zinc transporter ZnT-7                                                 | 5.00E-36 | 10 | 10 | 10 | 2.A.4.4.5    |
| PPERSA_00044240 | Q8RXN0, White-brown complex homolog protein 11                                 | 5.00E-36 | 4  | 4  | 4  | 3.A.1.204.8  |
| PPERSA_00059080 | Q38954, Putative phosphate permease                                            | 4.00E-34 | 11 | 12 | 11 | 2.A.20.2.4   |
| PPERSA_00021960 | Q8S403, Putative phosphate transporter 1                                       | 2.00E-33 | 4  | 4  | 4  | 2.A.94.1.1   |
| PPERSA_00042340 | A0ZXK6, Monosaccharide transporter                                             | 3.00E-28 | 10 | 12 | 10 | 2.A.1.1.43   |
| PPERSA_00039140 | Q5I0E9, Multidrug and toxin extrusion protein 1                                | 4.00E-28 | 11 | 11 | 10 | 2.A.66.1.15  |
| PPERSA_00110210 | P35670, Copper-transporting atpase 2 (ec 3.6.3.4) (copper pump 2)              | 4.00E-26 | 3  | 3  | 3  | 3.A.3.5.3    |
| PPERSA_00130700 | Q5BL44, Sodium-dependent phosphate transporter 1                               | 2.00E-25 | 12 | 12 | 12 | 2.A.20.2.6   |
| PPERSA_00097460 | Q6L8F3, Zinc transporter LIV1                                                  | 1.00E-23 | 8  | 8  | 6  | 2.A.5.4.2    |
| PPERSA_00101950 | P23500, Mitochondrial RNA splicing protein MRS4                                | 1.00E-22 | 4  | 6  | 3  | 2.A.29.5.2   |
| PPERSA_00123340 | Q9ULF5, Zinc transporter ZIP10                                                 | 1.00E-21 | 7  | 8  | 7  | 2.A.5.4.6    |
| PPERSA_00119980 | Q15070, Mitochondrial inner membrane protein OXA1L                             | 1.00E-21 | 3  | 4  | 3  | 2.A.9.1.2    |
| PPERSA_00104800 | P32386, ATP-dependent bile acid permease                                       | 8.00E-21 | 1  | 2  | 1  | 3.A.1.208.12 |
| PPERSA_00060790 | Q6PML9, Zinc transporter 9                                                     | 3.00E-19 | 4  | 4  | 4  | 2.A.4.6.1    |
| PPERSA_00119740 | Q93IP6, Ammonium/methylammoniumpermease                                        | 6.00E-19 | 11 | 10 | 9  | 1.A.11.2.3   |
| PPERSA_00124860 | A0ZXK6, Monosaccharide transporter                                             | 3.00E-17 | 7  | 10 | 8  | 2.A.1.1.43   |
| PPERSA_00097710 | Q86UD5, NHEDC2 protein                                                         | 3.00E-17 | 4  | 4  | 5  | 2.A.36.8.1   |
| PPERSA_00102210 | Q7Z3S7, Voltage-dependent calcium channel subunit alpha-2/delta-4              | 1.00E-16 | 1  | 1  | 1  | 8.A.18.4.1   |
| PPERSA_00076980 | A1Z264, Sugar/H+ symporter                                                     | 1.00E-15 | 10 | 9  | 8  | 2.A.1.1.69   |
| PPERSA_00011330 | P02982, Tetracycline resistance protein, class A                               | 1.00E-15 | 10 | 8  | 9  | 2.A.1.2.4    |
| PPERSA_00051310 | Q9JM15, Neuronal glutamine transporter                                         | 3.00E-15 | 11 | 10 | 9  | 2.A.18.6.1   |
| PPERSA_00093400 | O15554, Intermediate conductance calcium-activated potassium channel protein 4 | 3.00E-13 | 6  | 6  | 6  | 1.A.1.16.2   |
| PPERSA_00028830 | P21817, Ryanodine receptor 1                                                   | 5.00E-13 | 5  | 7  | 6  | 1.A.3.1.2    |
| PPERSA_00092060 | A0L3E7, Chromate transporter, chromate ion transporter (CHR) family            | 5.00E-12 | 8  | 11 | 8  | 2.A.51.1.4   |



|                 |                                                                          |          |    |    |    |             |
|-----------------|--------------------------------------------------------------------------|----------|----|----|----|-------------|
| PPERSA_00094760 | Q9VNJ5, Protein dispatched                                               | 3.00E-11 | 12 | 12 | 14 | 2.A.6.9.1   |
| PPERSA_00041810 | P38767, Hypothetical 64.2 kda protein in slt2-put2 intergenic region     | 4.00E-11 | 2  | 3  | 3  | 2.A.66.1.5  |
| PPERSA_00126160 | Q86GI9, KVS-1 - Caenorhabditiselegans                                    | 8.00E-11 | 2  | 2  | 2  | 1.A.1.2.8   |
| PPERSA_00117020 | O07488, Sulfate permease                                                 | 2.00E-10 | 11 | 9  | 10 | 2.A.53.3.1  |
| PPERSA_00098510 | P23631, Alpha-latrotoxin precursor                                       | 3.00E-10 | 1  | 1  | 1  | 1.C.63.1.1  |
| PPERSA_00081160 | Q8NTX0, Permeases of the major facilitator superfamily                   | 3.00E-10 | 3  | 4  | 3  | 2.A.1.1.53  |
| PPERSA_00007270 | Q8NEW0, Zinc transporter ZnT-7                                           | 2.00E-09 | 6  | 6  | 7  | 2.A.4.4.5   |
| PPERSA_00097360 | P0AAC4, Inner membrane protein ybhL                                      | 2.00E-08 | 5  | 6  | 5  | 9.B.24.2.2  |
| PPERSA_00023360 | Q95V25, Calcium-activated potassium channel slo-1                        | 3.00E-08 | 3  | 3  | 4  | 1.A.1.3.3   |
| PPERSA_00048800 | P38921, Putative mitochondrial carrier protein PET8                      | 4.00E-08 | 4  | 4  | 3  | 2.A.29.18.1 |
| PPERSA_00091790 | Q9LDC0, 42 kDa peptidyl-prolyl isomerase                                 | 4.00E-08 | 1  | 1  | 1  | 8.A.11.1.1  |
| PPERSA_00071890 | Q9KRU4, Probable multidrug resistance protein norM (Na+)/drug antiporter | 8.00E-08 | 6  | 6  | 5  | 2.A.66.1.2  |
| PPERSA_00006010 | Q5BL44, Sodium-dependent phosphate transporter 1                         | 9.00E-08 | 13 | 13 | 13 | 2.A.20.2.6  |
| PPERSA_00108680 | Q9H0U3, Implantation-associated protein                                  | 1.00E-07 | 3  | 3  | 3  | 9.A.45.1.1  |
| PPERSA_00057310 | O24662, Aquaporin 1                                                      | 2.00E-07 | 2  | 5  | 5  | 1.A.8.11.2  |
| PPERSA_00100560 | P73948, Slr1508 protein                                                  | 3.00E-07 | 1  | 2  | 2  | 2.A.38.4.5  |
| PPERSA_00045830 | Q9UL62, Short transient receptor potential channel 5                     | 2.00E-06 | 3  | 5  | 3  | 1.A.4.1.7   |
| PPERSA_00094520 | Q9FKS8, Lysine histidine transporter 1                                   | 2.00E-06 | 7  | 6  | 6  | 2.A.18.2.2  |
| PPERSA_00114840 | Q45308, Grm protein                                                      | 6.00E-06 | 2  | 3  | 2  | 2.A.37.2.3  |
| PPERSA_00094320 | Q96QE2, Proton myo-inositol co-transporter (Hmit)                        | 8.00E-06 | 6  | 5  | 5  | 2.A.1.1.25  |
| PPERSA_00099270 | P08995, Nodulin-26 (n-26)                                                | 1.00E-05 | 6  | 7  | 4  | 1.A.8.12.1  |
| PPERSA_00038860 | Q9VHS6, CG7459-PA                                                        | 2.00E-05 | 3  | 3  | 3  | 1.A.56.1.7  |
| PPERSA_00068860 | A9QMN9, TPK1                                                             | 3.00E-05 | 3  | 3  | 3  | 1.A.1.7.4   |
| PPERSA_00107980 | Q92339, High-affinity gluconate transporter ght3 (Hexose transporter 3)  | 4.00E-05 | 11 | 12 | 11 | 2.A.1.1.23  |
| PPERSA_00116400 | Q8WPZ6, Aquaglyceroporin                                                 | 6.00E-05 | 6  | 6  | 6  | 1.A.8.14.1  |
| PPERSA_00047490 | O29993, Iron (II) transporter (FeoB-1)                                   | 8.00E-05 | 1  | 2  | 2  | 9.A.8.1.8   |

|                 |                                               |          |    |    |    |            |
|-----------------|-----------------------------------------------|----------|----|----|----|------------|
| PPERSA_00130660 | Q9FGL2, Aquaporin TIP2-3                      | 1.00E-04 | 1  | 1  | 3  | 1.A.8.10.4 |
| PPERSA_00014350 | P94131,Cis,cis-muconate transport protein     | 1.00E-04 | 12 | 12 | 10 | 2.A.1.15.4 |
| PPERSA_00040270 | Q86G79, Arginine transporter AAP3             | 1.00E-04 | 3  | 3  | 3  | 2.A.18.6.9 |
| PPERSA_00080590 | P97260,Srebp cleavage activating protein      | 1.00E-04 | 5  | 8  | 7  | 2.A.6.6.4  |
| PPERSA_00115630 | Q37050, Chloroplast envelope membrane protein | 1.00E-04 | 1  | 1  | 1  | 9.B.73.1.1 |
| PPERSA_00079020 | Q07711, DNA topoisomerase I (EC 5.99.1.2)     | 2.00E-04 | 1  | 2  | 1  | 3.A.7.7.1  |
| PPERSA_00079050 | Q6INM0, MGC82368 protein                      | 3.00E-04 | 1  | 3  | 2  | 1.C.39.3.2 |

Note that all the transporters were annotated and assign the five TCDB characters class, specific transporters means that that the class (represent by the five characters) was only found in *P. persalinus* but not *T. thermophila*. For TMHMM, Toppred and SCAMPI, the number of predicted transmembrane helix listed.

**Table S3. 74 HGT genes in *T. thermophila*.**

| Gene_ID         | Annotation                                                                             | E-value   | Function category  |
|-----------------|----------------------------------------------------------------------------------------|-----------|--------------------|
| TTHERM_00628500 | (myosin heavy-chain) kinase [Haliscomenobacterhydrossis DSM 1100]                      | 1.00E-127 | Protein kinase     |
| TTHERM_00439260 | (myosin heavy-chain) kinase [Haliscomenobacterhydrossis DSM 1100]                      | 6.00E-95  | Protein kinase     |
| TTHERM_01006570 | (myosin heavy-chain) kinase [Haliscomenobacterhydrossis DSM 1100]                      | 1.00E-162 | Protein kinase     |
| TTHERM_00741670 | (myosin heavy-chain) kinase [Haliscomenobacterhydrossis DSM 1100]                      | 1.00E-135 | Protein kinase     |
| TTHERM_00701140 | serine/threonine protein kinase [Herpetosiphonaurantiacus DSM 785]                     | 9.00E-13  | Protein kinase     |
| TTHERM_01371780 | serine/threonine protein kinase [Mycobacterium parascrofulaceum]                       | 6.00E-09  | Protein kinase     |
| TTHERM_01131810 | chemotaxis sensory transducer [Pseudomonas syringaepv. aptata str. DSM 50252]          | 2.00E-12  | chemotaxis protein |
| TTHERM_00125780 | chemotaxis sensory transducer [Pseudomonas syringaepv. syringae B728a]                 | 1.00E-10  | chemotaxis protein |
| TTHERM_01131800 | chemotaxis sensory transducer, partial [Pseudomonas syringaepv. japonica str. M301072] | 4.00E-11  | chemotaxis protein |
| TTHERM_01050500 | chemotaxis protein [Pseudomonas coronafaciens]                                         | 5.00E-11  | chemotaxis protein |
| TTHERM_00126830 | chemotaxis protein [Pseudomonas coronafaciens]                                         | 3.00E-08  | chemotaxis protein |
| TTHERM_01050490 | chemotaxis protein [Pseudomonas coronafaciens]                                         | 6.00E-12  | chemotaxis protein |
| TTHERM_01050480 | chemotaxis protein [Pseudomonas coronafaciens]                                         | 6.00E-12  | chemotaxis protein |
| TTHERM_00126840 | chemotaxis protein [Pseudomonas coronafaciens]                                         | 4.00E-09  | chemotaxis protein |
| TTHERM_01130780 | chemotaxis protein [Pseudomonas syringae group genomosp. 3]                            | 3.00E-10  | chemotaxis protein |
| TTHERM_00324390 | methyl-accepting chemotaxis protein [Bacillus halodurans C-125]                        | 6.00E-08  | chemotaxis protein |
| TTHERM_00191490 | methyl-accepting chemotaxis protein [Clostridium beijerinckii]                         | 5.00E-07  | chemotaxis protein |
| TTHERM_00125790 | methyl-accepting chemotaxis protein [Pyrococcus yayanosii CH1]                         | 1.00E-08  | chemotaxis protein |
| TTHERM_00125800 | methyl-accepting chemotaxis protein [Pyrococcus yayanosii CH1]                         | 2.00E-09  | chemotaxis protein |
| TTHERM_00947350 | methyl-accepting chemotaxis sensory transducer [Thermotogapetrophila RKU-1]            | 1.00E-05  | chemotaxis protein |
| TTHERM_00125819 | putative methyl-accepting chemotaxis protein [Vibrio azureus]                          | 3.00E-08  | chemotaxis protein |
| TTHERM_00361630 | Tetratricopeptide repeat family [Coleofasciculuschthonoplastes]                        | 4.00E-41  | TPR family protein |

|                 |                                                                                          |           |                    |
|-----------------|------------------------------------------------------------------------------------------|-----------|--------------------|
| TTHERM_00697150 | tetratricopeptide repeat protein [Desulfobacterpostgatei]                                | 2.00E-10  | TPR family protein |
| TTHERM_00778410 | tetratricopeptide repeat protein [Methanoregulaformicica SMSP]                           | 1.00E-142 | TPR family protein |
| TTHERM_01001510 | tetratricopeptide repeat protein [Prevotella sp. CAG:1031]                               | 9.00E-23  | TPR family protein |
| TTHERM_01014690 | tetratricopeptide repeat protein, partial [Porphyromonasgingivalis]                      | 1.00E-12  | TPR family protein |
| TTHERM_00697260 | Tetratricopeptide TPR_2 repeat-containing protein [Caldithrixabyssi]                     | 6.00E-11  | TPR family protein |
| TTHERM_00815110 | TPR repeat [Methanosarcinabarkeri str. Fusaro]                                           | 1.00E-37  | TPR family protein |
| TTHERM_00283270 | TPR repeat [Methanosarcinabarkeri str. Fusaro]                                           | 5.00E-49  | TPR family protein |
| TTHERM_00701190 | TPR repeat containing protein-like protein [Adinetavaga]                                 | 3.00E-18  | TPR family protein |
| TTHERM_00657580 | TPR repeat containing protein-like protein [Philodinaroseola]                            | 3.00E-53  | TPR family protein |
| TTHERM_00079990 | TPR repeat domain-containing protein [Anabaena sp. 90]                                   | 3.00E-48  | TPR family protein |
| TTHERM_00617751 | TPR repeat domain-containing protein [Anabaena sp. 90]                                   | 2.00E-24  | TPR family protein |
| TTHERM_00188800 | TPR repeat domain-containing protein [Anabaena sp. 90]                                   | 6.00E-18  | TPR family protein |
| TTHERM_00346760 | TPR repeat family protein [Lyngbyaaestuarii]                                             | 1.00E-12  | TPR family protein |
| TTHERM_00219440 | D-alanyl-D-alanine carboxypeptidase family protein [Winogradskyellapsychrotolerans]      | 1.00E-52  | /                  |
| TTHERM_00348900 | DNA alkylation repair enzyme [Pseudomonas chlororaphis]                                  | 9.00E-64  | /                  |
| TTHERM_00348890 | DNA alkylation repair enzyme [Pseudomonas sp. GM50]                                      | 5.00E-81  | /                  |
| TTHERM_00122050 | FAD-binding protein [Aeromonasveronii]                                                   | 1.00E-155 | /                  |
| TTHERM_00784420 | glycine cleavage system H protein [Haliscomenobacterhydroxsis DSM 1100]                  | 3.00E-10  | /                  |
| TTHERM_00245770 | glycoside hydrolase family 5 [Gillisialimnaea]                                           | 1.00E-117 | /                  |
| TTHERM_00312470 | glycosyltransferase family 2 [Oscillatorianigro-viridis PCC 7112]                        | 4.00E-08  | /                  |
| TTHERM_01227790 | GNAT family acetyltransferase [Solobacteriummoorei]                                      | 9.00E-18  | /                  |
| TTHERM_00348080 | hypothetical protein LEUM_1748 [Leuconostocmesenteroides subsp. mesenteroides ATCC 8293] | 4.00E-09  | /                  |
| TTHERM_00325600 | membrane protein [Vibrio coralliilyticus]                                                | 3.00E-14  | /                  |
| TTHERM_00486540 | membrane protein [Vibrio splendidus]                                                     | 2.00E-30  | /                  |
| TTHERM_00218950 | metal-dependent hydrolase [Modestobactermarinus]                                         | 5.00E-15  | /                  |
| TTHERM_00348790 | metal-dependent hydrolase [Rhizobium sp. CF142]                                          | 2.00E-10  | /                  |

|                 |                                                                                               |          |   |
|-----------------|-----------------------------------------------------------------------------------------------|----------|---|
| TTHERM_00592830 | NAD-binding domain 4 [Capnocytophagacanimorsus Cc5]                                           | 3.00E-27 | / |
| TTHERM_00227539 | NB-ARC domain-containing protein [Cyanotheca sp. PCC 7822]                                    | 5.00E-20 | / |
| TTHERM_00170580 | NB-ARC domain-containing protein [Cyanotheca sp. PCC 7822]                                    | 8.00E-38 | / |
| TTHERM_00486460 | nucleotidyltransferase [Enterobacter sp. R4-368]                                              | 2.00E-12 | / |
| TTHERM_00194420 | peptidase S1 and S6 chymotrypsin/Hap [Cyanotheca sp. PCC 8802]                                | 4.00E-28 | / |
| TTHERM_00833880 | peptidase S1 and S6 chymotrypsin/Hap [Cyanotheca sp. PCC 8802]                                | 2.00E-33 | / |
| TTHERM_00107040 | peptidase-like protein [Trichodesmiumerythraeum IMS101]                                       | 5.00E-83 | / |
| TTHERM_00219050 | peptide methionine sulfoxide reductase [Rhodopirellulamaiorica]                               | 1.00E-72 | / |
| TTHERM_01029920 | photorhabdus clumping factor C [Photorhabdustemperata subsp. thracensis]                      | 1.00E-25 | / |
| TTHERM_01263960 | predicted protein [Hordeumvulgare subsp. vulgare]                                             | 9.00E-39 | / |
| TTHERM_01174650 | PREDICTED: protein NLRC3 [Otolemurgarnettii]                                                  | 2.00E-30 | / |
| TTHERM_00325620 | protein of unknown function DUF6 transmembrane [Stanieriacyanosphaera PCC 7437]               | 1.00E-28 | / |
| TTHERM_00689910 | putative nucleotidyltransferase [Pseudoalteromonasluteoviolacea]                              | 1.00E-06 | / |
| TTHERM_00437750 | putative O-linked N-acetylglucosaminetransferase, SPINDLY family [Synechococcus sp. PCC 7502] | 3.00E-10 | / |
| TTHERM_00538920 | putative Sarcosine oxidase [Legionella pneumophila subsp. pneumophila]                        | 4.00E-09 | / |
| TTHERM_00408900 | putative uncharacterized protein [Eubacterium sp. CAG:146]                                    | 7.00E-64 | / |
| TTHERM_00408930 | putative uncharacterized protein [Eubacterium sp. CAG:146]                                    | 4.00E-55 | / |
| TTHERM_00520910 | ribonuclease R [Tannerella forsythia ATCC 43037]                                              | 1.00E-05 | / |
| TTHERM_01232190 | structure-specific endonuclease subunit SLX4 [Cricetulusgriseus]                              | 4.00E-13 | / |
| TTHERM_00678120 | sucrose-phosphate phosphatase subfamily [Spirochaetasmargdinae DSM 11293]                     | 3.00E-08 | / |
| TTHERM_00214670 | surface antigen BspA [Treponemaazotonutricium ZAS-9]                                          | 6.00E-11 | / |
| TTHERM_01192460 | type IV pilus biogenesis/stability protein PilW [Lyngbyaaestuarii]                            | 2.00E-15 | / |
| TTHERM_00227570 | WD40 repeat-containing protein [Nostoc sp. PCC 7524]                                          | 1.00E-19 | / |
| TTHERM_01351030 | WD40 repeat-containing protein [Nostoc sp. PCC 7524]                                          | 7.00E-53 | / |
| TTHERM_01045800 | alpha/beta hydrolase fold protein [Chlorobiumphaeovibrioides DSM 265]                         | 2.00E-07 | / |
| TTHERM_00431240 | Appr-1-p processing domain protein [Aciduliprofundumboonei T469]                              | 1.00E-09 | / |

|                 |                                                                                     |          |   |
|-----------------|-------------------------------------------------------------------------------------|----------|---|
| TTHERM_00227390 | cell division control protein 48 AAA family protein [Methanosarcinaacetivorans C2A] | 1.00E-11 | / |
|-----------------|-------------------------------------------------------------------------------------|----------|---|

**Table S4. Primers used for the HGT genes verification.**

| <b>HGT_Gene_ID</b> | <b>F_primer_5'-3'</b>    | <b>R_primer_5'-3'</b>   | <b>Product_length</b> |
|--------------------|--------------------------|-------------------------|-----------------------|
| PPERSA_00056740    | TGTCTACGGAATCTTAATTG     | TCTTGAAACAACCTCAAACACT  | 423                   |
| PPERSA_00029910    | CAATTTTAACGAATTTCCAGC    | AGGACCAGTTAAGATTAATAA   | 461                   |
| PPERSA_00047700    | GGGGTTAACGATATTATTGA     | AAAATTATCTTTACGGAAGG    | 380                   |
| PPERSA_00098980    | AGGTCAGGGTATTTAAGTT      | TTATAAAATTTGGACAGCCT    | 427                   |
| PPERSA_00002080    | CAAATCATAAAGCAAATCATAAAG | TGGAGAGAAAGAGAGGTTTTTA  | 436                   |
| PPERSA_00035610    | GGATGAATTTTATAAGAATAAG   | AGCAGACAAATAGAAGAAAC    | 417                   |
| PPERSA_00117390    | GTATTAACCTTCAACAATTCTA   | AAAGTTTAGAATTAAGCCCA    | 373                   |
| PPERSA_00079580    | TTAAGTGTCTCCAAATCCTTG    | ATTTTTTCGACTGCTAATCT    | 419                   |
| PPERSA_00031570    | TGATCTGTATGAAAACCTTGAGTC | AGTATAAAGGAAAAGGCA      | 280                   |
| PPERSA_00130810    | CTTGAGCCATTTTTAAAAGC     | GAATTTTGAGGTGTCTTTGTAGT | 373                   |
| PPERSA_00076120    | TTTAAAGGAAATTAATGAGA     | TTTAATAAGCCAAAGACCCA    | 328                   |
| PPERSA_00055830    | ATTCCTGTGTGTGAATAGTTAAG  | TGATTATGTAATATAGAAGATTG | 463                   |
| PPERSA_00113410    | GTGTTTTTCTTGTTTTTTGAAAG  | CAACAGCTTTTTTAGGTTT     | 422                   |
| PPERSA_00109590    | CCGGAATTCAAATCAAATAC     | ATTTCCGACTCCCATTTTT     | 441                   |
| PPERSA_00073400    | TCTAGCTACTTCTAAAACGT     | AATAACTTTTTAATGTCC      | 395                   |
| PPERSA_00069080    | TCGCGAAACCATAAGAAATT     | TTGTATTGTACATACTGGGTTAG | 487                   |
| PPERSA_00041150    | TCGTTTATATTAGATGGAGG     | GGAAACACAGTAACTTTTGGAAT | 311                   |
| PPERSA_00069770    | AGGGGACACTATAATGATTTAAG  | TGCTAATTTAACTGGTTATTG   | 385                   |
| PPERSA_00059730    | CAGGTTTAACTAATTTCTCTC    | CATTTGGGTACTTGTGTTTA    | 399                   |
| PPERSA_00059750    | ATTTACCAGAGTTTTCACAG     | AGCTAGAAGAATGAGGTAAAATC | 392                   |

**Protein sequences of 54 HGT genes:**

>PPERSA\_00089970

MKFNRLNLKQTKFISAVKSQFDINQAQTPLSGRSKSYHGNEFMGILRQKISSPNLIMRDAVLVDSQNSQQIPIFSFAGSGELEDGANNAFKEEQLKKELEIGIRQKKKKKVYSSLQEYYTQFYF  
PNEFRLKQQYFSNTKFHEKTDLFYKPFEEVIKDYLEVAFATCFSDVPKCDIRVQIIQQKETTETIYQQFLNYIKDDIEEDFKIRHNFEQIKKNHIHQPIKYFEKLNQYQEVQLLASKILTTPKDFQKED  
YHTVKNNPQIMHFLIQIFRQNYDKAKFILDVFIQSNQAITYLDYSLIKFQTWKHFLLKDKQNVQQQLEIKDVQLILQHIEFRIFMFQQNINAIKEQQDQIVQCLTKVKILKSDQYFGKFPILIQ  
QFLEDFISTFMLNRQYQNILTFDDTLLNELKQAVLSCLPPNIENPYIQKKDIISKIYIFKLENNLIQDQDVAQDDIAAIVYLALNKNVKIQAILVTGSGEAYCDQGIENIEKMLNFINYEDIPVLCGDNYP  
LQGYFSFPKIVRDFANTDKFTFFTEQNDQKQKQYKRQNIKKNQHAADFQVEFLNNQKEKNIDILVLPITNLALSQKDPQIVDKINKVVFMMGGSLDVEGNLNLNPNHQSENKYAEWNVFSDS  
LAAKQVIENYNLDFYLSLDGTSQVPVTKDYIDQIHNLISEIIKKNQNESLQFASFFTNLFRKQIYKYPQSKLDFWVLAQAALIDPNVCQFQKEKVQRENDVERQFRVYNNWFVNLNRKSQREI  
NNGQIFRSKDGALNNSVEIEAVFITGSGEAYCDQGINNIVKTLDFLNYKDIPVCGQNYPIQGYLQFPQIIRDRANSDFPFLPLSNKRNVRNQSAIDFQIQFLQNLEQDEKINLLILGPMTNLALS  
EKEPEIYKLDQIYFMGGAVDAPGNLHPIGIYETENIFTEYNIFADSKSAQMVFANKNLKLMIGLDGTNQLPITAEYLQNLQKIEKKKFSNSLQLLNALKYGEFFVEIFYDWVRKYQKAELYFW  
DVLAATAIHHDDVCTYEENLYVQVTEISKEEENELERKFRIDQNWFPYHNRTSLREIDNGRILKSQELGNPIKYCKNVDKKIFDEAIENSLGLEYIIQLQEKIE\*

>PPERSA\_00083530

MQKNTNFLQKISQYLKYLPIQAPMAGGSITNEIITEVTKQGLGSLATGLMKPEQVYNQVKQLNKLMMNNVPYNINLFPVPEFQNKANRQQIENVWKILKQYDNLGDLGRKIPLOQYQTDGFEIL  
DIVVKNKNKIVSFTFGCLEGSEIERLKRKNEAFIMGTATNLKEAIYLQDQGVDAIILQSEAGGHRGSFLFNKGENQQNKPELIQLEDLVGEIPIIASGGISNKNQIQNYMAQGVGDVGSIGTMFLTT  
KESGIKAKNKNILLENKNIGTTISRCYSGKYARSLNSSFTKNMEKHLDELLPYNIQLKLTQYANTQSDREYGAIYAGSKYYDCQDITVKDLLQELLKGF\*

>PPERSA\_00084980

MKKNIQLQPIVPMNNEQDEYNLNNHVNKNFNDESPNDSGTQNNNDNNKSSNFNQQNKSESSLIDKNHYILLNKQQNQNPCKTINFIQKPKHENIFVAKPLNEKQIAYFKKNKTM  
HLSVQNVVNNYSSSERNEKMEKSEQIDNSSTNSYCSNSYKLPKIFYNKSIKQKARPGTTRYQGTNYGFDKIKFRHIGYDTPFPVYADNFDEPDQGPFPQQDQNLNFNHSQKNWVVIHG  
LEQPKLIKAVCKQFVDVEDDLSHEQKEEMWNGWVADFVETHSNPTLNDIDSNQLYMVIKYLKFKKNDSSIVVKHFSFVAGQNYLLTFLEDGKQEIDGEEIINTTIDFEHYMEEIMNKIYKNDKKY  
CKSNVYFILFKLIDKIVECYQNTLRQFSAQVIDPLDNEVIENPTSKTLKRLHNARTEMLEIKYATKPMQNMIKRILKRQSFYNKDLQNNIPGFDLNLQNLQSQSQMGTLQENQIDNGLIKSNELKN  
QFKKKPSMQNKNQLQQQNSDSNGIIQSKTNKSTYYNTQNNENDDSSSIADSPMKQKNKW\*

>PPERSA\_00041150

MESNKVLVIYNQKCSKCRETQQLLEQKKEKNSSLSIDYHYLLQDGISEQLLEKIVDLLKVSVDVKNIMRDTDQLYKDLKIKESNFSQQELKNLIKNPALLQRPIVYQDKAVIARPPSNINEIL\*

>PPERSA\_00117390

MIAYAGGEVGNTEEQPLKSGASWMTILTGNWANYHKVVSQNGPSKTSKIFNYIKKQKPHSKLSYIYHWAQFQTLVRNDLNYIDYHKKLDKKGQESYIYDLFLQSYQDDMIIPDFTFIQFDNID  
HVGHSEGLSQNYNDQVFETDKIIGKILENIEEIKAQNQNLFLIFIVTDHGRDKKGAHGNYYIQKTEKQSFIGTLQPELLNDEFHVKVIQAPISDYDNIYSYPSIANLVPTILDFLNIEKGQNFNGISM



IGKLG LQKLMKIDNKYYWAKIYNPNEGQKISYGDGKLIDTIENTVSQWPDSNFQQDLIKQYTKITFVYNQQQVTYYNKNYSIPFYFYLNNIDFNDTYFLIFFYGLMISILFNVFVCFALS VKKIIKMK  
FVKKKSKIPKIKDDIKSENDQSQQIYQQMIDISIK\*

>PPERSA\_00031570

MNKLQKLRDFFVRITGGVDNYKGGIKQIHQNLEIKISEYEFVKIYQCLKNAGFKKEVVDQFLQKLAEYKEDIVFDYNVESTVDSSFHTDQDDVVFINH\*

>PPERSA\_00073390

MKQISNTLLKTKSLNKSQQYTFAYGKIKEDLSKQLQQLEVDGLYKRERIIDSPQGKITLQDGSKVINFCSSNNYLGLSNNQRVIDGAKNAMDKYGYGLSSVRFICGTQSLHKQTEKKVSDFLGTEDTI  
LYAACFDANGGVFEPLLEQDAIISDELNHASIIDGVR LCKSKRYRYKHSNMQELEQNLIDANQR YRIVCTDGVFSMDGDVAKLQEIADLCKYDALLMVDDSHATGYLGATGRGTHELCGVKD  
RVDIITTTFGKALGGALGGCTSGRREIIDMLRQKSRPYLFSNTLAPAICGGTQAVIDMLSESTELKEKTVENARYFREKMEAKGFDLVKGN TAIVPVMVYDEPLAVKMANEMLKEGIYVIGFCYPV  
VPRGKARITQLSAAHTKDELDQAVEAFTKVGKNLKI\*

>PPERSA\_00098990

MSEKMIKLEKKYQNQPEFKLCTAKTANTLSRPSEDSNNSNENKNDHIFGFEKDIQQIAIDVTKGAFQTESVPVVKNKYNFNLNKIIIVLILVSIYLSIIADLSHYKKQKQLNSHKFDDVDFSLN  
ISYEDFYEQTKLPLSQLQAKCSHNSFEAGNYEQLNFNKNTPYQGGLMLEFDIMHDIQENSEEYGYMSHLQESHGQTL DGLQQVQDFHNQNDHLPFLTINIKPQLRNLEYGFNPEKF  
YYGLERTIVSALNINDIYTPAELLNGEKNLFEAVTNGYPVQVQLLGKIFIVLDVSEQEDNNDPLFYQFYENYINQVEQSLMWGTLDTKLIQRTYYSIKQYMEQTQNYNKIFINMKANYFYDSDKY  
AYLKGIDVLKEAQNLLNLLTRGYVLNNMNNYIKYRDMGMNFLCTDKIFHNHFAVAY\*

>PPERSA\_00045220

MDIVQIGSARADPVKFM DLVDSSQTKRCQRYVEKCN GPTL FINKQKKSALDY LSEAFKGM EQYKDKIGMIIDSSTTRGFTEPSQC SLYAMHLGIRY AACFDVVEACNGWVRAAETAYYYLNCRE  
ELEDKYVLIINNEYPPETRAVVPKSPDDYQACASYVGLTFSTVCTV TLLKKSNNRSWRFFNSSDTIYASHINIPLPGLAKDFCPTSKEYSVYFTECYGQFCLPRFHAMEEKGLEVLAYVEKRKEFFED  
ANVICHTYTKKVWEELFQFNKFKLSLYFNETGNLGS CSFPYIAKDQYGTTL PKGEHIAFMGTAAGGSGSIVTFVHEQDDGPLDSQYPKVKKVEPIGRKLLLLKLGFALFKKILCQKKRNYKSYSP  
QGAVDQKTE\*

>PPERSA\_00055830

MSANNKSWLYLPQNIQEK TQNSQQKPSVCIIGAGIVGLTSAYFLQKSNFFGKITIIEKEKEPGTAAS FVNAGYLVFSKVIPVCEQLRNINLSIFKYMDINLENLYQATRFGIYAYYDFFK GALSSKYKQE  
RTETYSVYGERCKETFWKILQDEGIKESEIGLQRGCNYLYR DENKFKNSLEILEQQKPYIIQNIPLKQNKNGYLQKMITN NEDCTASSWHFLNILLKKMEKGNFQLITGKEVTELIKNEKNNRIIDG  
IKCKDGEIISNYIFC NNGLIQHII SYPLVIMSGFSWTFYKNNTKNQALINEVDNCP SVVDY EKCIYYSIYNDRLRVTYGFYLNPNFQKLK NDFKQYTPNPFWKDEAEKQVENMTIGTRCVSPNG  
APFLGQLGDYENAFINTGHGFIGWTLSTYTGLLLSKIILQKMGHQIEFDQIEKNIMKITNPKRYII\*

>PPERSA\_00035610

MSTEQITIEQQETLIK RQQNPHKNQDKNLHKNQKNQNTNTSPTQQQNIQQSHKKKIYHKHVLIHKAYKFLQSKVESPEIKKQFLSRQIEETPKYRGQIHNYGKWISLIPSILLIICAR SFKARRN

AIIYSIGVFWMQFISSKMHCPRYQTAPTWIRKLDNISIFLYIGMNWFTIFEQVMIEDPKWEVTFGLVTVLMVVAIILRALTLHSPRWLISGIALLMGWLSIILLPTIIQKLNITYEQTVFALGGLSITLGA  
VCWALQFPKKKKGSHWTPHETFHLGTFYEEKI\*

>PPERSA\_00107980

MAQFLEQQVEPDAIMKFFPFYGYIALLMGTIGKIMSAPGQSVICIGVVIGPVQIASGYSNTLISILYFFATTLGGFSLPYTGKYIQKYGQRKSISFISVMLGIACYIFANVHTWWSLFIGFYLLRFIGQG  
AIMAVSVTQVNYWWWTLRGKVMGYASAGLSAFLTGFAPLLVNIYVGEYGWWRATYELGNISFFVMLPLGFLFFREPPEYGLLPDGKKNALIEKPNRRTINEMDKEMENLLVNKNEYQISNNQ  
EIIQEDIQDLGKQNKKKRFSIVIEQTNEEVHWDVKDMLKTWAFWTSCVSLFVASLTSTAYFFYMNRIKENGIPDSTVNYVYTFIAIISVIIPLSAGQLMDKVEPHNMYKVSLLSFLAQLTIIFINKD  
SFFLVYFSTFCEGICFGIAIIVGNTIFANYFGRKNLSQIQTIAACVEIFGSATGPVPYSIIKDIFDDFTYAFIFGQILCLLAIYLSHVKGKGPVNPQAQVDDIDQEQQLSSINLDK\*

>PPERSA\_00109590

MDRVGGRVFTTETGVDLGASVWHQWQHKDNTVRKLEKLNVPVGENSDQEVLEDFDQVSQTRVDPAIIMKAQKHLDRIEISIQKASKLKRDSIYDCVKEELQQIDNMEDELYKRVFYQFL  
AQCLNNEAATLKELSAKMGVGNPQTNENQKCSVRETQDNYSYKDYEDKIIQQGYGNLFQDLSQNLNIKNSEVQEINYIKNQTMPFNFIKVYNNKTQQTEFFYAKYLLVTCSEIKVLQNDVISFQ  
PELSQQKQKAIKKLGLGQANKVLEFEKCFWDERIYSVCLAQQKENFADFPIFYNMKKYKNKNILMALLSDDQAIISERKTDQELVDSAISKLQQVYQKNYPEFDDSYFKVKNYVTRWGANKFI  
QGAYAYYPVGANHEDSNELLVPEYDNNLYFAGDATIADLIGTANASSYSGEQQAHEHIIQKYMFDQSQEVLPKL\*

>PPERSA\_00029910

MSYDIYAKLSQNIISLTANSTDPFPIENSYDNNIFTEYKSNDSEVELEITYDIQFIPIGVRIVSGQSMNAPLYFHLYAFNTYTNDWDTLSYLKFGDLDIYFQYLIEIDDLNKKSSWGGQYVQISEI  
SIIKPTSISQYEQVNRLAEDAFDFNFKKETFSWLNVEDTFEYTIKTEIYYQQNLQSTIDALPTGLIFNQS NLQISGTLNPQYKHKILKIFITAKDSSNTQQTEQFEIDYASIIIGYIFEQENLIQNIASN  
SKQESGSLNSVIYDNIDKSYQFTGAENQYIDTNFNEFPAKFSFFMKIQT TTTENCILATNRQCGTTCTDEPGFTIYMQSGFWSVIVVDENQNFVTEYVDIINDGLEHVIGFYTILSDSLVTYQDGF  
LFAQPNCPENTIKDCTGRCVSDYYERDKCITGLFADFYSFEIPYLECPELGCKDNCYECLPYNPENKIKSINSLKIGDFFQSEPSYSGKVFVFIKYNRELTFQEVLGIYRQQNCYQWETPLQETYNTLY  
NGILRTKTLVSVPTGNIISNCQYLYEESVLDPSLLTYELYVNTINEKNVYIDNHILYFAEEFYFGQEITIYVEGLDYQYTSMFEPITAKIKGKYDEMYEIVAVVSGEQISHYNNVINIYDIHKGQINGVTYI  
FTTKLWSQIQFEKIEYVFNKINFQQAYYESLSYPQEIMSSSRLYQIQNTYFLIVTVSTNDLDGIKIYVNTNPSDPKVVGGQISEGIVTGFEAKIEVVQIDQVWYSIFKTNSQIFLLNINDPTNPYNSGFS  
VYSNSIFSQINGLQYVVLNQLRISDASNGQFQSVLNEIIFDSETNQSQSVTQSKIFAQYDAQNSAVVYLYTIVLNEVGFQTYLLDVSDTNFFMTLLYQKYLYGINDLQIFIVGNIYYLALM  
GSDYGIDIYDTRDTKSPVFIQHFDYKGVKAIEFYENEYKNYLIIAQTSEKGVSAIKLDLIYNNTQTNPYQTLSSQNNYENEISDMTTKYFTQAVVYNNYNNQDYIASIIQKYIANQMAYTFYLIQKVT  
SFYQQTQVLKQFQWLQTRFSSTQSKETILQLERAGSNYIIIRYAYTRLSIFDITDLDNVYLVSDVNGEKYMQSSGGLAKIYKINDIDFVFCYDLQLLMYDISDLSNVIKQRFTGIYDFQYVQAID  
FYQDWSGQH MVATSMYQTSFWKIKYDSNFDYGLPLVGITWLETTVDLKRVDNWNFGYVERSFTGSASIYNNRYIYVSNQNGIYIYDYTDIQNITLLKYLDQYATNTQFNMYMGFIKINLKTY  
LQVCAQDSGLIMIDVTDPENSGFLYSFETNLAMQFQTIIDNEEYNNIADQIGGIRISKIQYQYAYPIISQEIENGSKQFNILKIYQPSYFQPYFTSGMIKLLDIQVLKQNSQLNTFTTIPSWMTVNL  
DQQIVSLKPSKAELDEINKIYVYSLKIDEQELQEYVEAAYPTSSLDYEKLELISYGHITKKMFIQEYIDENYNLQSSQFDDYLEGITGFLKTQQFYGHMLANTDYITASNPPVITCSEQLYKYL  
QSKQDTLCPQNIQEQNLNSQLQISLGLKVAKVGKYISFRFSENTFYDYDEEKLTYISISNIKRTFENKTIIDGLYTDISWLAFSDEYRILQGTPTTEYNNILEISITASDGYDNTTALLIHDHSTIPPKQNK

NVDNLQKQFNSQNPNPQIGQQILFNFQNSIPFIDDDKDDLKYLAYKFIKSQSKFIYILDNLKYDTANYLSFNNTLTFQGTVPKNYNKETEIYCVQAFDGYEYSDCQIFKIEYNDKAPKLKSKIGNQK  
VTVNQNFQFTLQSDSFEDEDKQLSITATQSDGSPDPWLQFDSSNTFYGTPEIVNVEIQLTATDIEGKSVQTTFIIDVQSIYYLGGQLQMYGGILLGFIGLFGVWVNYRDEFHNLFSKSRKDCLVI  
GETQYQKYIPIISQEFQNTCEKAWNIFTNNAKNNNLRTSATFDIQNLIINNFDIEPIFQAMKXILVDPKNKLDPKQVDKIFQETYNKYSKDKLKTNFGIIIQHLLNHFRLLQDGETNQIYNQIKKK  
VQNQIITYASQKLKSPLDWYKEFVEILEKDLDEIEQNKFPNLSVKKLEIFDYVMEILDPDNKIDENNYQQDYLYFYNKSFVNNKKNINNKDKTTQDQSVQIQSKKNKEINKNNQKATQQHVKINF  
KLLKDAILSEAQMQUETIKVAKSRYINVVKALVRKHKFFQLSLIRFLKKEQYNIEGHKNDPLPSWLKYQFLQKTAILLEGIPQSTDDLELILQVQDSKDFILREYLLEIKKPDQKLLKLSKSFTHPLLYG  
KANQNKNNQSTAFDNYNYPKQDTNQQSAQQAILSNQLDSFTNTTIEQLDEEGIKTRASLINRNSIYKSKLYKSKTKVQENGDKNQKTNIIQNQSSLLSLSQKSPDQKIGKQQSIIKINLQNNYLY  
QDEKSDTMSPQGCIFSQNTLQFESNDKLVNFKNENNDAINNISNSPNNQLSKKSIYAKFQNKIINSSSGDNDASQNRDQDLQNSNRNLISPVKVKRQRSIFAEFRNINNSPDTDIQIDISSNN  
SSNSNNNNNNNNNSNCNQNNNDEVNKKQKSDNQISNPSKSLKKTNLAYPKVHEQISNDDQQIEIDDDEN\*

>PPERSA\_00073400

MSQVPKYLIIGGGGQIGPVLLKQLRNIVGNQNVVLSDMRNDLDYDLMNSSGPFYQLDVTNGEALSEIVKKEKITGIYHLAALLSGRCEEVPELAFKINQGGLOQNVLEVARLNNCQVFPSTIGVFG  
KFFNPNTIQTSDHLRPTSIYGITKVFGEILLCDYYHNKYGVDTRGVRYPGIISTNILGGGTTDYAVYMPQHAVQKDYDCFLLPDTRLDMMHIDDAVNATIQLMHADPSKLVHRNSFNITAMNFTP  
HELHKEIQKYPEFNVSYNNINNLKQKIADSWPNNMSSSCAEAEWGFKPIYDFESMVKMVIDQLKQEQQLQSTQSTQSTQTKENEVNL\*

>PPERSA\_00069080

MSQKISAITGAFSYTGRYVTQILQQQGVQVRNLTNHPSRPVKNQINKDQIDVYPLNYDDVNSLSKSLGADTLYCTYWVRFNDYKGTTRREQGIQRAKNIIQAAKNVGIQKIIYTSHTQSSLESFP  
AYINGKAQMEEYIKESGISYGFAPCMIFGDTPQESIVANNAYLLRKLPIFLIPGGQGNYPVQPVHVRDMAQLMVKMAEDKNQNDQDFDAVGPEIFTYNEFIQLIQDATNSKVLKIKGLNTDVVHK  
MITPVEYLLKDKFIEKDDLLTNNYLHKSQPPTGSIKSEWVYQNRREQLGKRYINSTDLYYTGETTIFDKVQKI\*

>PPERSA\_00035440

MTIFQLNKINNETLKSQVSINTKNKNKQKQVLNFQAGSEKSIQSQEDTSDDSFKQLDFENEQTLDEYNSQLDLELTQVTAKCSHNSYEIGQVQEQQLQFNETHPYQGGSQMLEFDIFPQNITDEA  
LNNDTQEQQQYIFYTFHDQPKSLEECQTLNLFDDIKEYHTNKNHLPFVTLNIKQWITEQYTLDAKIFYKNLEQTLNFAFISDDLYIPDILLNGEQNLFTSVQKYGFPKVSALLGKIVFLVDCAQG  
GNETPKYTEFIQYYLEQDISRNLMFNFTFDSRLIQSGQFDSIYDYMINTGNYNQIFINIKQNYRKDLFKQKYIKQFSILKEAQQNLVTRGWNLSDIFLYTVFRKMGVNFACTDYIFDTEFSIAY\*

>PPERSA\_00076120

MEQTSDDKINSPIIKGVQYYPNFIENPKELFEFLDKNCNWDTSMKARKTVSFGVPYNYGQMSYENNNFPKQLQEINEKIEKKIGFLPNNCLINYEDGLSRMGYHSDRTDNLEPNTGVVIISLGET  
RLLKYRKIPQNNNDNNDNQENENYDKNWENKNEKNQNEFWNYLEDGSLAYQSLEIQKTHQHSVPMDKGIKNPRMSLTFRRVIQNKN\*

>PPERSA\_00069770

MLEYSKGTVPVMVIKNQNLNENKFKQKQEKNEKQVLEQSLDIMEYILSLQDYNQILKKYQNSIEQQNLIKKNDQFKLLLDKYKYWTKYPGNQEEYKNDCFIFLKELEQLLQKNNFLFGQDFSF  
SDIAIFPFISGKFEVQLIQRKNCSLKQFLNKETKVLYKKKQRQFTIDVQVAKNIFNQQQQIQIFKEFQNTLSSNSTQDVGSSDRVNSPQIIIVSPNDQNSQYQQQPSILETKNKTLSLNQRYQQ

QNFNYLTVPPFFRNLLSDKISKNKQKLGKNDLKIQISHLSNLKLPESNINKEIQVDYCLSTSKYILNDRSGFRMEYSVTKKDNEYKNQNDFYINHSQVLDIGQKYLQKAILKEDMTLVIRVSQNIQEY  
DQINNINIGWCKVNLQNFMEKTLFEGKIKSQLWKPPMSLQQNQENNNNNNQPKICQQNQIIILSLKYI\*

>PPERSA\_00054440

MTKLQSNLSQNNLCIVQSYQKQYDNQQNVEIQQLENEKNQTAQVLQKNDKILISYRNLSVKDKLQTSYSDQQLQSDPELLIKYQNIYKQNDQLQQKNQELKQQNDKLYEKYNNLDMKYRQ  
LYYGEKIDISTYDGLYNQNSNTFIEYYNSQLNLELTQITAKCSHNSFDIGRIQDQLTFNETHSYQGGSQMLEFDIFPQNNTDELFPQQEYIFYTFHGIPKSLDECLTFNGQLQDIATYHENNSQHLP  
FVTLNVKQWIIIEYTLDTQTFYESLEQSILNVFDQDLYIPNNLLNGESNLFSSIQKNGFPVSELLGKIIFVDSSYQQDEKAEFTKFIQYYLEYGLETKLMFNTLDTRIIQNGKYDSIQEFMNETN  
NLIFINIKQNYKKDLYPEQYKENGPPQFCLY\*

>PPERSA\_00079580

MKYFIIQIITLFAIFNFSEQVFQQNDLIQENDKQNHQKQKVVLLGLDGLDYRQLSNGITNGELIGLSQFTYQKSYCGGEIGTPTEQPVKSGPSWMTILTGNWMNQHHVSTNLSGPTQETKSIY  
RYIKQANPGSNLAIVSHWSVIENKLLRNDRQDIDIIQQILSDENDNNIYEKWLRTLKNGIPDFTFFHFNDIDHSAHLQGFGETVNTKIINADKVIQKIMLKIKELISQNNLDFLVMVSDHGRDKY  
GWTGHTIKQYSEKLTWIGTNQPQIFNDEFFLPSTAPIQLNSIYNFPFITNIVPTILNYLEIDYKKENINGISMIGDIGQ\*

>PPERSA\_00125500

MQQKSEQLNQEKKIRQKPIQLYEYNIWPKLAEQSAKELKEIMMPDLNDPKIKGFQHGISTSIKGMAGTRFIDLAVMVKDVPLSNEVSQNLKKNGYLDLGMMDHMDGGQWFQKRNEQD  
DFDKVGEAVVIHAFAGEKGLQSFQKQIFARDYLNHDEKAKNQYLFVKSLEKENQPFQYKQKSEFVKQISEESVKWADKNNLWEKYK\*

>PPERSA\_00057430

MKIKVFEQSMYDGTFTETINLNDEKIQEYYTGEFQDIQIASCQDCVQIYLVFERQDVIKQKIDFGQIFYPVNHANKNLLIGYQQNYTVKRIYFPQTISFVQMYQLESDQYELEELNINYNLFFPT  
EDIKNSQIPFKAGGEYFVVNFYQRDLNLDYIYLLYNKESYEFYKIEYDYNVQIYENSDFLIQYTTSTSYIFYKAKKGSNVINFNNVFENSYYINKCKNGIQDCNFPDYLDQKIDNTVQTNHR  
FNLTERASSNDFYSVFIYTYIFDGTESLETYSSTNSKSYAPNIRLVSDKYIYHSDTPYVWFVNCITQPNKGSDDASLEPTKITQSYSGTDYQMKLIYNSKGKYLQAASNLGVQTADLAGILKV  
ESSGNGFTASTGLMIIRFENHWFYKLYTNNGQDSAKVATFNKYFKFDSTSTWKNHYRSTSSDWISFHGNQNLWDCLQFAQSLDDTAAIQSASYGIAQIMGFNYKTLGFSTPQKMFLDMSG  
SIKAQLDGMFNFNIKSSKCYNALKSNPTDYNFAYCYNGSGQAATYGNLIKDASASYKKTAAIGEDDNNSGPVLQMAAGDVIQFSSQINIRNGPGTSNTVVGTTSTGQEAVITSGPSSNNGYSW  
YKITMVPNGVQGYVAHSSGWFSPKYQIRQNDTVKTTTSVYLRSTPGGSSLGLLSSGTQGGKVTGNPVVSGGYVWYPIKVTSSGSQGFACAMGSGYLTKI\*

>PPERSA\_00050920

MDIVEIGATQGGQNYNFMQVHPSMKEKCEKYVKKSKGPTNLFRLNDGRTPMQFVEDAFKPLQKYKEKIAVVIDGSTTRGFQMPQSASLYSHLGLKPNQYFDMVEACNGFCRALETAYMMF  
QTQPDLEDKYILIIINNEQPPDTRGVLPESVANYKQVASYVGLTFSHVCTCTILEKSDNYSWKFNHYTCTVATNINIPLPYISSLFPKCEFDIEITDCYQGFQIPSHHDLEKKAFFSLNIVENDIEFY  
KKAHVITHTFSTRYYERFFANSHFQKLSVYYNEAGNLGASLPWILYDNYGGKIPQDQNISFIGNAAGGSNLTQFQSHKSKYDCPQVVDHRHKYNKNNLLKIGLRSKFYEWVLRQGGKTPIST  
YDPKKNQDNNKNQVIQTKKAWEEVVKQMEQHLEENKWWYPVDNQLQQFKKSNKISSN\*

>PPERSA\_00098980

MQQKIHPSQDISLAQNKKAYINQNNYYNKATRDIDIEPSLNQDKKFQKTNTNSTGSTDDSGGETYDIEKNDFEKQKQKDENHQENAQFVTQNPAYLLPLKNFTRFPQYENYYEFMKNQNLRSR  
IQTKCSHNSYDIENYYEQLTFDNKKPYQGGVLMLEFDIYPKININSTIQQKYKMGLAHTKDDKEEKPLINALQEVNEYLQDNPQSLPIFITLNIKEWLLDLIESPKVFFDSIEFEFLEIFSQNQIFTPKQI  
LQGEKNLYDAIIFGQPKVSQMLGKIVIIIDPAQSNLKNQKEFQEIIDYYTNDLSDKLMFATLSDSLIQNGDYINIKDFMETNKNYNQIFVNLKGDYTFQDKKEKYFKTFDILNEAKELNFISRLYNLN  
QIDQYILFRDMGMNFLCTDHIFDYPPYVAY\*

>PPERSA\_00036040

MNINGIAHIILSVNNVQKSKLFYEPLLYMGMKKVKDEKQFLYFVGGRTAIGLEQRNILTNEYQITENQQNVGLHHFCLRAKSREDVDKAYQKVKTLPNANIVQSPIEKQWAPGYYTFLFEDPD  
GIRIEVNFVPGKGLLETKKKVEFNAKL\*

>PPERSA\_00047700

MLKGILSLILINIIDSYINHLKNSHDKYFKYITLKRYLSFIIFPLLILEGLYINKKIPRLGVPADETKGLIKNSNSENPSENKLFKILYIGESTIAGVGLNSHQEGLSRQTALKLVQRKDFKIDIEYDSIGQNG  
ANIKYLLEKILPRFDAKNFDTVIIAIGVNDIIEQTNLTKLKKQLEVIQKIKQQNNDIKIHSSPPMDKFKALPQLRSLFLGYRAIQISHIYRSISKQQENVFYSLAEFEYDRKFFAPDHFHPSHGNFQ  
WAEIMAQSIEPVIIHKD\*

>PPERSA\_00021250

MAENDIVGLSFGYQDGEVQWLQGFQGHANINENIMVDAESTEFRWASMSKQVTSILSYKLNERNKGLDLNADISKYWQKYQRPNYFVIKNGQDFVEYDDYKYQCAANDFAYVEVEQDTIITQ  
SMLLSHYAGIESYGDGTTNPVPPDSKKNDRINDGIEWAMQYFMNAPFVSQPNSSYAYTTFGLNMAGVVCTYADAEYQGRYEDLARALVFERVYGNVGSIQPDFYWLEKYRPPQRATGYKNPQ  
QLSVDNDVSYKTPGGYISNVKDALTALNYRNETLLTNDQKSRWTPYNEKINAYYGMGFQLWYQQDQLLSVGHGSDGARSMMRYYPQVDVAMVFMSENENLNTSKLLKIEKILWR  
NGVPLPENWNFQEDTEQVQFQRDIQI\*

>PPERSA\_00131510

MDIVEISAVTGQQVNYLEQIPENFKSGCKRYVDKCGGPEFIYKEKQNKTPQYVQEAFAKPLEKYKDKILMVIDSSTTRGFCEPSQASLYAQLGLRNSQCFDISEACNGFSRSLQIAYQFFETDINFEE  
KYILIIINNEQPPEGRAKLPESDRNYKQIASYYVGSTFSLCCLTLLQKSENYSWKFMNDSDTIYASHINISLPLNGQGYLPIHELYSVELNDQYGGFCIPKHLQLEEKAVKVLKYISKRNKFYEQANVIC  
HTLAKNSWQQMFQFQKVQQLSLTYNETGNLASASLPFILFQYQGNLPGKQKIAFMGVGAGGSGVVIEWEHQKTNENVKNSSNNNRNHHKYLTDKSDSSYKKWWDKYTLRIFLQETKRKIFC  
QKRKNKNIKNGYNKEE\*

>PPERSA\_00059750

MFAAIIICFGLTTVTLGQTMARAEALLSFIGVIFMFIALLSKDIATLKPSEQFALLVIGSFLSGSAIANFQLIVEMVMWYPLEIAGTVQGIFAGIGNLFLGAFGLILINCLQNGLSLIGGYIIVLVLFVIT  
LPLTYIYLQKTPLTLQIDQKMEENKATIIAEFCGQQNFPSKFHIIKSNYLKGYIMAYHKTTVYEALFQNFTEFSCITSFTRVFTGYLTDKITGFLSTQISLIHIISSLILSFSQSNSPHSMHIGLLFLAIGIGF  
MMAGNYKWIVEIRYNHILAIGMLAGFFGALGGPILYLLLSYFLQLQEQLFQQQIKY\*

>PPERSA\_00113410

MPKKVVIVGGVAGGASCAARLRRLSEQVQITMFEKGEYISFANGLPYIYGGVIEDRSKLLVQTVDKMSKRFNLDIRNYSEVIKIDRQNKQVQVKNWKTNEVYVEKYDKLVLAPGADPIKPPIPGI  
NAENIYTLRNIPDTRIKKYIDENKPKKAVVIGGGFIGLEMIEMMALRGIQTTLVEMADHVMGPLDYEMASLVHQHLKLGVEVFLQDGVTEFEEQQDKSIKMKLQSGKIIETDFIVLSIGVKPEI  
KLAKEAGIKCNKGIVTNLRMETSDDIYALGDAAEVQNIIVSKQRALIPLAGPANKQGRIVADQITGRKVSFKFGSQGTGIVKIFDIHAATTGLNERQLRQLDREYMESITHSSSHAGYYPGGFVTAIK  
ILFCPYSQQLFGAQVVGAMVDKRIDVLATAVRQKMTVYDLEELELAYAPPFSSAKDPVNYAGFVGANMLKGDVKMIQWNEIQSAVQNEGAILIDVRTPEEYEQGTIPGSINIELDTIRDNLDF  
PKDKLIIFCQAGLRIYASRILYNGYKEYVDLAGGFKTWHYAFKQSNIEGIFSRDKITSQGMVVQEVVDKALNSNYVYWDKDFENFSPKAKQKLESHPLYDANIQQSQQN\*

>PPERSA\_00130810

MQSLKVLNNQVAKSQFKNLYQDQVVYAFASKYSLKAIDLNDADAPQRFVQSLKDTGFGVIKNHPIKQERVQSIYDNWYKFFQSERKHEYLYNKGTQDGYFPPNVSEIAKGNVVKDIKEYFHIYP  
FGQIPPELKEEAMAYYKDTSKFASQLLQWIQDFTPEEVKNKYCPLPEMIRDTDQTLRLVHYPPFSGKEEPGAIRAAAHEDINLITILPSANEPGLQVKTLDGEWIDVPSDFGNLIVNIGDMLQEA  
SGHYFPSTPHRVINPTGEATKKSRIPLFLHPRPDVVLSDKYTAESYLKERLIELGVLY\*

>PPERSA\_00011350

MSIGIQSQTQQQLEYYYHLKQIIQAQPNLQKIKNIKEKLQVQKKNILPQQSLQLLELQQLNQNQQQNIQQQIQQQMQHQHFPFSVKEICEQHNIELLVQKTMNSKKSIFLEDADLIVLGG  
VPVLKEIIFKRPKYGCVNTHSGILPDMRGTCAFIWSIYDIPLGCTSHYVIKEIDQGALINIEYLDVVRGDTLENLFWKQSDLCVSAVNAVKKLLNKEQKFESLPNDLNRGRYCSIPGPEIVERARQIL  
ENQEYSHYSSEK\*

>PPERSA\_00086300

MDIVAIGSSQNEVDFMVSLVDSSMKEKCLKYQTKCRGPYKVLNRNDAKKTAVQFLEEAFKPLEQYKDKIGVVIDGSTTRGFTEPSTASLYAQHLGIDGPVCFDVTEACNGWARAVETAYMMFQTN  
PNYEDKYILITNNEHPPMTRPMLPKDPSDYRQVASYVGLTFSWACTCTLLKSDNYSWQFIHSDPVYASHISIPLPQIAKGFTPKSDVYEILLNEEYQFCIPRLHQQEKKIQFVLGTVDQNEEFY  
AKTNVICTHTWTKYVYEEFFKNHKLGELSLYFGEIGNVGSMSPLILHDQYKNNIPKQHLFCGSAAGGSDIMLNFVHGIETEKLLQKKEKSNLYVIYARVAWRLLTLKGCRRQNKVKVQADT  
KTQ\*

>PPERSA\_00032590

MKEKQNIQNLLELPQKQEIININQQQONQELNKELNKTYNTNLITQNIKQONQEQQQEETNLIQSVLCVHGDGKGWNGLFWKNIMIPLAEKGFQVYVIDMPCGQSQGNKYDFRNKGV  
EVLDEVIKNLGLKDIILCGESVGGRTVINFNVFKQPKLQNNVVKIKMLVLTHTPVLSTQQMQEYNNHKIPTLVTAEDDIQHPYNGPHGVRYIKQMLKCEILSWKEEQYSISEFYKTSYCQKFE  
QLYNKKNYKNVQJNNKR\*

>PPERSA\_00043810

MEQEQNQEQKVIVCALYKFRPFSKQFRPQLLQFMENNNVTGSLLANEGINGTVASDRQGIDNLLKFLNSNEILSPIEYKESTAFKMPFKTKVVKLNEIVTMGVGDIDPLKVVGTYYVEPKEW  
NKIISDPECVVIDTRNDYKYKIGTFERAIDPNIHTFTQFPEYIQKNLDPKKNKKVAMFCTGGIRCEKSTAYMKQLGYENVYHLKGGILKYLEEVPKEQSLWKGEVYFDERISVNHDLPEGQTQPPYYT



SDLNDKKKILQEEDAQINQMLSELOKKAQKQFIQKITVMGKILNLNKNKPYINNSCTNTEISQNSPSNLLLPPQNKQQTFSQYYQLQHQKTSSESSPSNNNINNDNNRKFQKFIKKYIIP  
YDTEYRLTTQRRYRLRLEIAKNWRLIR\*

>PPERSA\_00121720

MLAQEFSDQGCQQFIITGSATGKVDKLNATHYCLVENFDLQKNCLTCRGPICASSESMTHGNLYKMDKNTKVVIHVHNNKMWKRLHLHKIPTTDKNAQYGTPEIAKEVERLFLETNVKDQKIFVL  
EGHEDGIFSGETFQEAYDIIYRIIINDEEI\*

>PPERSA\_00125930

MNVSLTLYGVRKVNHLIKNQWWAVYAHLIANRIRRLGVLAEIFLDDDFVELQKLHNIKIIISGGPNSTLDENSPHINKKIFDLQVPILGLCYGHQSICKTFGSKIVPGEVKEYGLATLNIDLKNSPIF  
KNLHNQQRWMSHGSDSVISPEGFEEIGSTQSCEIAALQNLQKQIFSFQYHPEVTHTQNGVQMIKNFLFEICKCDDSQWDPKQYQTSIQNEIQYIQNKKTGSKIFTLVSGGV DSTVAFTLLNKAL  
GKDLNYGLFINNGLLRKGEFEVDESIKKLGVDNFHSYDASEIFLNNLKEVYDPEEKRKIIGKTFIEVQRKVLQELNLPQEWLLGQGTIYPTIESKGTKHSDLIKTHHNRVEIIQDMINQGNVVEP  
LQNLKYDEVRAVGLGLPQNLIWRHPFPGPGLGVRCLCSEFDSVDQEYLQKFHHINKEITKALEEHDINGSILQVKSQVGVQGDQRTYRHPACIYAQNIFQNFQNYKEQKMGEQIKEDDEEQNW  
IWARLEHYSTQLTNKYDEINRVVILLKSRNYDAFAQNDNQNKLQKVYITEKRISVLQ MADHITMKHLIGNNLMKIVWQCPTVLIPLGQKGESIVLRPVFSQEAMTAEFAKIDFKILEKLATEILD  
QVQEITEVYYDITNKPPGTIEWE\*

>PPERSA\_00037920

MQQNNNNQIQKICDKCQFKSCLCEKIPQIELNAEFCLYHQNEQFKATNTGQLLENAIKKVDKFLWSRIKPNPDLKLLQSEKYQPYLLFPGNELHPSIQFPSENQEIVTEYKIEDKKQNEEQQE  
QQQLQNEEQQLQQQIDEIKNIKQFENQNLQKIPVKKCKIYIDKIPYFIIIDGVWKEANKIVKQSPYLQNIPLRLELKPDKVSQFSLRRRQREDGLCTCEVGIYIIRNCLQEKEKAQQLEEYEQFVQ  
QFQKEQKKRYIRDEEYVIDKDTRQKILKSKFDNEVTQKKVKI\*

>PPERSA\_00036460

MDNLDTQLILQNLQHINKESNFMINNNIKINKVLKCGSIQMVMGHKLNINHFGAIYAGSIYSLAQQAGKFAIYSFQKEKVVVQIKKSEIQYLIPGKRDLVEIKINNEQQKIIQEVNEHGKSNITL  
FDIKEQNGTVVSKFKGHYIIEKKQNMPKL\*

>PPERSA\_00036150

MFQNNVIKNNFSSSIKLSRETFEKLKFKETQELSPFYHKDTLKYLSHLDNMNLIALLKLNATPQQLNNYYDQYLQERDIKKAQINEAKDSQIVDKQTFLLQQLNKYELYESYLYFLKDVVEYKQNKKS  
NEIINEYIPILYPGIGSEAYHCVIKIAYGLDHDNQAQEQILQGLAYLASAALFPNEYGSKSKDKGIFETLEEIHKKQEQYFKKITHFDEPRVFNKIIKLIQIDDKFQDLVPHFIIEGSFEEHIIKISFLIKLFI  
TDNFLILHTVTGFYATKRLLKQLEKEEDKILVVDLKNVSAAYAIGDFIKIQNREKLEKRLQIPKNLSEWEEIINKANNSYDDHDNKLTZYICKMEYNYLKENGYDENTYNLYRYAAAIQTLLLE\*

>PPERSA\_00036470

MINQQGDRVPFLTRNGVKIIDIKKGYCKVKLEYNDQILNESDQIDEGVIYSLAESISGIVFETYFDGKRYFPLVYRQSIEFLKIPPKVDLFVEQTFSSQRQAEQIEEELNKKGKSKYKTTANVVDKEGNIY  
AKSYGYMGSLSNYKL\*



>PPERSA\_00042620

MGNQDQNSVIVSSSNKQSSLFYIYSYPVVFSPILLFSSEETGIAHNIIVSDDFTKLFVSESDGLIYDIQDIKNPVKKENLNFGDNHIYAAYNSKSMAAIIEINTGIEIVSISSTYNYIFLGEVTYNNFQP  
VSVAFSQNGDYLFVLDELLNQVLIFDISNLPYSYLVKXINLEYSYQIEVRDKYAYLAAGYQGVIIIDIQNVNNAQIIIGQVQLPTLATFVTYIEEDDLIASDLEYGLQIIQWDDIQYPIINQADTLDKCY  
QVVQEKNSQDFYVASGTAGIQGFRLKFSQTEQVIETLTENIPYHRIIKEINIQLNSYTYITQNAQYLFAVSTDGEFYNSNSDKTSPVLSKQIAIGGIPKEIIVSISKNYAYVTL\*

>PPERSA\_00125230

MSDTQNASSGLNVPRIEELLVQGGNYTKQSFLEQEPGKYFYQSDFNFVIAIIEINIVKQRFDIYMNENVLEPLGISGSFNIDDLSONQINNLACLYDIDDLGVLYESKNCFKKQKPDFHTLTNGYIV  
GTNGLFNPPQGLNLTEELHQVLYMLYNDGISIKDKKQIIQKSSDLMKTIQWQYDGNNAKQSSFIQAYGQGLQISTDKKIDQIFPGRQVVGHTGQAYGLMSNMFFDAKNGNGYIFAHNG  
MKQQPLFSNKSFKYKIEQDLIDLSYNALYTEKYQMSFLVAFRIIIGMAYIGAIIFGVFFCYNKKQEKQKQKQKNDVLLNEELEKQEIK\*

>PPERSA\_00059730

MFAAIIICFGTGLTTISLLAQTMARAEQLNEDIKQFVLVIPNLTGCFRLFYVGRGIAIEGGRKSALVCALLTFIGVLIMFIALISKDISTLQSSDEQFAFLVIGSFLSGSAIANFQLIVEMVMWYPLEIAGTV  
QGIFAGVGNLFLGAFGLILINCLQNGLSLIGGYIIVLVLVITLPLTYIYLQKTPLTLQIDQKMEENKATIIAEFCGQQNFPSKFHALKSMRDIPTIIICLNYYFFCFGGFLSISSYLKGYIMAYHKTTVYEALF  
QNFTFSCITSLTRVFTGYLTDKITGFLSTQISLIHIISSLILSFSQSNPSHFMHIGLLFLAIGIGFMMAGNYKWIVEIRYNHILAIGMLAGFFGALGGPILQLTLFDESLAKGGQYLPLAFLFFTTLGIVILI  
INQVLHIDQIKKQKASMYK\*

>PPERSA\_00010290

MEDLRKNIEELNLKQVKTYIQTGNIVFKSDKNETQLKELIQNQIKQKYNFEVTTIVIKQVDLVQILQKNPFLQIEKSKDQQQNKNTREEIISIQENEINIQNTKKQKVKTKVKNNNNINKKTDYLVFFE  
KKIDDEILQNLNLDKIQDKFEINPIFTNILYLKVDYGYGATKLNINFFEKQLKIKGTVRNLNTCQKVIEMLNQIK\*

>PPERSA\_00117680

MDIKMNSEQINLSEIEKYQFQIFKPASLLVIVTIFVWLAMNATRFPIISKLDLQVLNYPTQKEKILQSVSGPSNNFINLFEFPVLFYLACVVIACVCKINSGSFMSLAYGFVFFRAIHSLIQSTYNLIMHR  
FMVYVISCLILFIMWGNILYHIW\*

>PPERSA\_00050710

MLQKNEQITQKAHYIESLQPGYSIKPGQVDQFYTEAYEQIQEISDLQIKNQTVKIGIDFGNVIVGSDPNANDPDEDTMFGENYLQVKAIPDAIEGVKFLVEKFGADNIYVSKAKQKMQGKSLN  
WMQHYDFYNKTGILEKHMIVKWSQIKWMNLQ\*

>PPERSA\_00009640

MNTYTQILKAQIDTDQKEFDNGISRNNQILIQTNQSIQNQESSEVIIIEIEEFRQQDFNQNGIQLLKEQSSKYQQVTKKIEKYNKKGRRNSNKSXVNIQSSQKTIPANGNQNNNDLKEQQQIKQPN  
YKQNKNNKNSKQINKNQCTNYPQNTKRFLRSHSKQLLKLKTQISETPRTKKIHQVLMKLNLLTSYQLLQKKAQKLRPEILSEILDFAFQNTTTHLKKALHAQEEKLRSSLFLMNKQKQKQ  
LLTWNYLLVDKSKKVQFQTDLLSQNIKSLYNGKILKKGVGRNPPKEVIQNIKKEFMMFEYEPGFFIKQGMFEYDKENYQAIQFNVYLEQYNHTNKTAIINRGLSYMMLKFKFDKALEDLQNC

KLYPQCHTGMYSGWVKYQQSNLESALYDLLIAQELNNQDIYVYIYLSLTFMCLKVFDKSEEACLNALKLNPNNVFAQAVLHKIKTQKVFAKNQQKQLNANNIKIMNNIQEQNQILQNYRIKLQQE  
IDQQLEQQIIPQIEE\*

>PPERSA\_00076020

MKQIFTRLKSHNYLKYQKSIQNISEKYQVECFQKLNPPKVPGNLYGIINKGIENLYKENSLLAVSPSVYDIENQDEKLSVISCLQSFEKMYHVTVLSNFSIGFDKYSMTYSKENLEKSTFKNQFYLLTED  
ELEIGYQKSDKLLKLNLDNQRILCTTSDYIQKSKNKLQKNQNTGLGYYIDDNKIKISELYVDDNGKMKPISVEDAYALSMKINQKKLYSYQDLVPRTISILPVAQGCQAKCPCFSHTSVSKDVK  
QKILNKHIEATLQYAKQGAERAVITGGGEPTMLPFHYIILIKQCKKHFDREVIMITNGYNLGHIEQEERKAALQALDEAGLNILAVSRHDIKTKLMNLETKSHKIARSLQGMQFLRNQLRWV  
CVIQKGGVQDEESLVRYLDDVVETGGCDQINFKELYVASSQESVYEEEGNEFCRKNQVSLSLITEFLDKNNAKVLKAREFVGLGI\*
